# Supplementary material for: Hyperspectral mapping of density, porosity, stiffness, and strength in hydrothermally altered volcanic rocks
Source: Copernicus journal article supplement (doi:10.5194/egusphere-2025-1904), 2025-05-15
Supplement: Supplementary file [file egusphere-2025-1904-RC1-supplement.pdf]

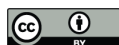

# 1 Hyperspectral mapping of density, porosity, stiffness, and strength in 2 hydrothermally altered volcanic rocks

3 Samuel T. Thiele<sup>1</sup>, Gabor Kereszturi<sup>2</sup>, Michael J. Heap<sup>3,4</sup>, Andréa de Lima Ribeiro<sup>1</sup>, Akshay Kamath<sup>1</sup>,  
4 Maia Kidd<sup>2</sup>, Matías Tramontini<sup>5</sup>, Marina Rosas-Carbajal<sup>6</sup>, Richard Gloaguen<sup>1</sup>

5

6 <sup>1</sup>Helmholtz-Zentrum Dresden-Rossendorf, Helmholtz Institute Freiberg, Chemnitz Str. 40, 09599 Freiberg, Germany

7 <sup>2</sup>Volcanic Risk Solutions, School of Agriculture and Environment, Massey University, Palmerston North, New Zealand

8 <sup>3</sup>Université de Strasbourg, CNRS, Institut Terre et Environnement de Strasbourg, UMR 7063, 5 rue Descartes, Strasbourg

9 F-67084, France

10 <sup>4</sup>Institut Universitaire de France (IUF), Paris, France

11 <sup>5</sup>CONICET - Facultad de Ciencias Astronómicas y Geofísicas, Universidad Nacional de La Plata, Argentina

12 <sup>6</sup>Université de Paris Cité, Institut de Physique du Globe de Paris, CNRS, F-75005 Paris, France

13 *Correspondence to:* Samuel T Thiele (s.thiele@hzdr.de)

14 **Abstract.** Heterogeneous structures and diverse volcanic, hydrothermal, and geomorphological processes hinder the  
15 characterisation of the mechanical properties of volcanic rock masses. Laboratory experiments can provide accurate rock  
16 property measurements, but are limited by sample scale and labor-intensive procedures. In this contribution, we expand on  
17 previous research linking the hyperspectral fingerprints of rocks to their physical and mechanical properties. We acquired a  
18 unique reflectance dataset covering the visible-near infrared (VNIR), shortwave infrared (SWIR), midwave infrared  
19 (MWIR), and longwave infrared (LWIR) of rocks sampled on eight basaltic to andesitic volcanoes. We trained several  
20 machine learning models to predict density, porosity, uniaxial compressive strength (UCS), and Young's modulus (E) from  
21 the spectral data. Significantly, nonlinear techniques such as multilayer perceptron (MLP) models were able to explain up to  
22 80% of the variance in density and porosity, and 65–70% of the variance in UCS and E. Shapley value analysis, a tool from  
23 explainable AI, highlights the dominant contribution of VNIR-SWIR features that can be attributed to hydrothermal  
24 alteration and MWIR-LWIR features **witnessing** volcanic glass content and, likely, fabric and/or surface roughness. These  
25 results demonstrate that hyperspectral imaging can serve as a robust proxy for rock physical and mechanical properties,  
26 offering an efficient, scalable method for characterising large areas of exposed volcanic rock. The integration of these data  
27 with geomechanical models could enhance hazard assessment, infrastructure development, and resource utilisation in  
28 volcanic regions.

29



## 30 1 Introduction

31 Society is dependent on subsurface resources, including groundwater (Foster et al., 2013), low-carbon energy (Lund and  
32 Toth, 2021; Soltani et al., 2019) and critical raw materials (Lewicka et al., 2021). Simultaneously, population growth and  
33 increasingly extreme weather (Aubry et al., 2022; Farquharson et al., 2015) expose a growing number of people to  
34 geological hazards, including rock falls, landslides, and volcanic eruptions. Effective management of these resources and  
35 hazards requires detailed characterisation of the subsurface geology, its physical properties (e.g., density and permeability),  
36 and its mechanical behaviour (e.g., strength and deformability).

37 Volcanic regions commonly host mineral, water, and geothermal resources, and are also extremely prone to geological  
38 hazards. However, the mechanical behavior of volcanic rock masses remains challenging to characterize, due to the diverse  
39 volcanic, hydrothermal, sedimentological and geomorphological processes that shape and reshape them (Heap and Violay,  
40 2021). Although mechanical properties can be accurately and routinely measured in the laboratory, samples are typically  
41 limited to the centimeter- to decimeter-scale, which is several orders of magnitude smaller than is required to predict surface  
42 deformation or reservoir behavior. Obtaining sufficient measurements to statistically characterize large-scale mechanical  
43 variability thus remains a challenge, given the laborious mechanical tests required to measure e.g., strength, stiffness, and  
44 hydraulic properties.

45 Several proxy measures have been developed to help mitigate sampling limitations, including field measurements of porosity  
46 and permeability (Farquharson et al., 2015; Mordensky et al., 2018), Schmidt hardness (del Potro and Hürlimann, 2009;  
47 Dinçer et al., 2004; Harnett et al., 2019; Mordensky et al., 2018), point-load strength (Poganj et al., 2025), reflectance  
48 spectroscopy (Bakun-Mazor et al., 2024; Kereszturi et al., 2023; Schaefer et al., 2021), and thermal inertia (Franzosi et al.,  
49 2023; Loche et al., 2021; Mineo and Pappalardo, 2016). These proxies are easier to obtain than many mechanical test results,  
50 and often correlate well with important laboratory-measured properties like strength and stiffness after calibration for  
51 specific geological contexts or settings.

52 Hyperspectral reflectance data could provide an especially useful proxy for mechanical properties, as they can be collected  
53 rapidly and, potentially, acquired remotely using imaging sensors. This approach could make use of the latent influence that  
54 lithological properties like mineralogy, fabric, and porosity have on both the hyperspectral and mechanical response. For  
55 instance, Schaefer et al. (2021) used visible-near (VNIR; 350–900 nm) and shortwave (SWIR; 900–2500 nm) infrared  
56 reflectance spectroscopy to correlate spectral features and mineralogy with porosity and strength, and identified moderate  
57 Spearman rank correlation with 390, 2207, and 2325 nm features. Kereszturi et al. (2023) also used VNIR and SWIR  
58 hyperspectral data to predict porosity and unconfined compressive strength (UCS) in volcanic rocks, explaining 40–50% of  
59 the mechanical variance. Lee et al. (2023) applied VNIR, SWIR, and midwave infrared (MWIR; 3000–5200 nm) data to  
60 predict the dynamic elastic moduli of finely laminated shales, with  $R^2$  scores between 0.4 and 0.8, but across a small sample  
61 set. Most recently, Bakun-Mazor et al. (2024) used VNIR-SWIR and longwave infrared (LWIR; 7000–12000 nm) spectra to  
62 estimate several mechanical properties, including UCS, in carbonate rocks, with generally high (0.8 to 0.9)  $R^2$  scores.



63 However, further research is needed to understand the relationships between hyperspectral data and the mechanical  
64 properties of volcanic rocks, due to their complex microstructures and mineralogies, as well as the impact of hydrothermal  
65 alteration.

66 In this contribution we investigate the relationships between hyperspectral data and the mechanical properties of volcanic  
67 rocks, specifically focusing on density, porosity, UCS, and Young's modulus (E). E is of particular interest, as it has not  
68 previously been linked to hyperspectral data and is crucial to predict surface deformation occurring during e.g. construction  
69 or tunnelling works, mining, and volcanic unrest (Arens et al., 2022; Harnett and Heap, 2021; Heap et al., 2020b, 2021b;  
70 Hickey et al., 2022; Hoek and Diederichs, 2006; Strehlow et al., 2015; Vrakas et al., 2018).

71 We therefore expanded the dataset presented by Kereszturi et al. (2023) to include samples from more volcanoes, and cover  
72 an extended spectral range (VNIR-SWIR-MWIR-LWIR). This dataset is then leveraged to:

- 73 1. Train machine learning models to predict density, porosity, UCS, and E.
- 74 2. Identify hyperspectral indicators for hydrothermal alteration, and explore how these are linked to the measured and  
75 predicted mechanical properties.
- 76 3. Quantify the influence of different spectral ranges on each predicted property, to explore the spectral features that  
77 inform our model.

78 By advancing our understanding of the correlations between hyperspectral and mechanical properties, we ultimately aim to  
79 improve our ability to characterise complex and heterogeneous volcanic rock masses.

## 80 2 Theory

### 81 2.1 Light-matter interactions: reflection and scattering

82 Light-matter interactions are complex, and governed by multiple interacting optical phenomena. *Reflectance* is a remotely  
83 measurable, dimensionless expression of these interactions, defined by the ratio between the excitation signal (illumination  
84 or irradiance,  $\text{W.m}^{-2}$ ) and signals emitted back towards a sensor (radiance,  $\text{W.m}^{-2}.\text{sr}^{-1}$ ). Hyperspectral sensors measure this  
85 returned radiance, and split it into many narrow but contiguous wavelength ranges to derive a radiance spectra that, after  
86 correction to derive reflectance, contains information on the target material.

87 Links between hyperspectral reflectance spectra and mineralogy are well established, as reviewed by Laukamp et al. (2021)  
88 and Williams and Ramsey (2024). Specific spectral ranges can be used to identify certain elements, due to the absorption of  
89 VNIR range light during electronic transitions in metals like Fe, and covalent bonds that absorb energy at specific  
90 wavelengths by stretching and bending activity. Compounds containing O-H, C-O and S-O bonds tend to have diagnostic  
91 absorption features in the SWIR and MWIR ranges, while stretching and bending vibrations of Si-O bonds cause absorption  
92 in the upper MWIR and LWIR ranges.

93 In volcanic contexts, electronic transition absorptions in the VNIR range can be used to detect common  $\text{Fe}^{3+}$  and  $\text{Fe}^{2+}$  rich  
94 minerals, including hematite, goethite, and jarosite. SWIR range data are sensitive to hydroxylated silicates, including clay



minerals, sulphates, and carbonates. The MWIR range is less widely used, but also includes diagnostic absorption features for hydroxylate silicate and carbonate minerals. Finally, the upper MWIR and LWIR range is strongly influenced by absorptions from the Si-O bonds in silicate minerals and glasses, and can be used to characterise the extent of silica polymerization and to identify most rock-forming silicates (e.g., quartz, feldspars, pyroxene). Regardless of the spectral range, features observed in reflectance spectra are determined by a combination of refraction, absorption and scattering characteristics inherent to each material, and abide by Snell's law (Kirkland et al., 2003; Rost et al., 2018). The expected positions of absorption features are well-established, including subtle variations caused by differences in crystal structure that often allow precise identification of specific minerals (Laukamp et al., 2021). However, spectral characteristics like overall albedo, broad fluctuations in reflectance intensity, and the depth and asymmetry of absorption modes (spectral contrast), can vary significantly between rocks with the same mineralogy. These wavelength-dependent variations derive from processes occurring as light interacts with the surface of a rock and while traveling through its solid constituents (and pore spaces), carrying information linked to surface and bulk physical properties. For consistency, we refer to changes in the direction and intensity of light which are directly dependent on the surface characteristics as 'surface scattering', and as 'volume scattering' when these changes are linked to processes occurring below the surface. Accordingly, light-matter interactions in natural minerals can be understood through the combination of two optical scattering components: surface and volume (Osterloo et al., 2012; Rost et al., 2018; Vincent and Hunt, 1968). Surface scattering occurs when light interacts mostly with the superficial layer of a mineral, which acts as a mirror-like interface and reflects light without transmitting it to the internal constituents of a rock (hereafter referred to as grains, although we use this term inclusively of crystals, clasts and fragments) (Fig. 1a). This happens when the extinction coefficient of light in a medium ( $k$ ) is larger than its refractive index ( $n$ ); as most of the incident radiation is absorbed at the surface and not transmitted to higher depths (Hardgrove et al., 2016). The magnitude of surface scattering can vary with wavelength (as  $n$  and  $k$  are both wavelength dependent), and is highly sensitive to the scale of surface topography relative to the wavelength (Rayleigh's criterion; Hapke, 2012, 1981). A surface is considered perfectly smooth when its average roughness is smaller than the wavelength of the incident light, with the outgoing light being reflected at the same angle as the incoming radiation. This phenomenon, known as *specular reflection*, is particularly important in the LWIR region (5,000–50,000 nm) (Fig. 1a). As roughness increases, surface irregularities serve as points for the incoming light to scatter into several directions, spreading the total reflected energy in a Lambertian-like process known as *diffuse scattering* (Fig. 1a). Diffuse scattering is particularly important in the VNIR-SWIR analysis of rough surfaces in which asperities are oriented towards different directions. In extreme cases, multiple diffuse patterns can occur within a small area, leading to a multi-path scattering pattern (Fig. 1a). In addition to impacting surface scattering, increased roughness enhances the transmission of incoming light through grains at the sample surface, even when  $k$  is larger than  $n$ . This process, known as *volume scattering*, introduces longer paths and changes in direction for light travelling within the medium leading to partial energy loss and reduced spectral contrast (Kirkland et al., 2003, 2001; Osterloo et al., 2012; Rost et al., 2018) due to light undergoing absorption within the medium



prior to being scattered back to the surface (Fig. 1d). Increased volume scattering is also linked to the grain size, and observed especially in the presence of smaller grains (Hunt and Vincent, 1968; Lyon, 1965; Mustard and Hays, 1997; Salisbury and Wald, 1992). It is important to note that although the impact of volume scattering on the reflectance spectrum is dependent on the inherent optical properties of the mineral, roughness, and the wavelength of the incoming light, these relationships are highly non-linear and difficult to characterise for real multi-phase materials (i.e. rocks). In the LWIR, both increased and decreased spectral contrast have been associated with volume scattering, highlighting the complexity of these interactions (Osterloo et al., 2012).

For most real materials and mineral mixtures, both surface and volume scattering influence the reflectance spectra, with different contributions depending (again) on the surface roughness, grain size, and wavelength range. An exemplary case of surface and volume processes acting simultaneously is encountered for porous materials (Fig 1e). Pore size, shape and distribution are directly linked to surface roughness, impacting the light-matter interaction dynamics by: i) enhancing the volume scattering by transmitting light through interfaces barriers with different  $k$  and  $n$  (e.g. mineral/air/mineral interfaces), leading to longer travel paths; and ii) by trapping light at pores with high depth-to-width ratios, causing multiple surface reflection paths (cavity effect) and, in extreme cases, leading to total absorption of light before it can be reflected out of the cavity (Hardgrove et al., 2016; Huang et al., 2021; Kirkland et al., 2001). Ultimately, increased porosity may lead to important changes in the reflectance spectrum, particularly in the thermal region (5,000–50,000), and is associated with reduced spectral contrast and inhibition of diagnostic mineralogical absorption features (Osterloo et al., 2012; Rost et al., 2018; Salisbury and Eastes, 1985).

## 2.2 Hapke's model

Hyperspectral cameras operate as fixed-position external-reflectance sensors, collecting the radiation scattered in a specific direction from a material excited by a light source of known characteristics. Hence, material properties which affect the amount of radiation scattered towards a detector influence the measured spectra. Several models (broadly known as the Hapke model) have been proposed to investigate these light-mineral interaction dynamics, initially in the context of extraterrestrial remote sensing (Hapke, 2012, 2008, 2002, 1984, 1981). Hapke's models aim to estimate bidirectional reflectance signals collected by external-reflectance sensors. They are based on radiative transfer theory and on the works from Chandrasekhar (1960), and form an important theoretical basis for hyperspectral imaging applications. The core premise of Hapke's models is that reflectance spectra can be parameterised as a function of material type and morphological properties (Hapke, 1993).

While a detailed examination of Hapke's model(s) is beyond the scope of this contribution, we aim here to identify several key elements that link reflectance signals with roughness, grain size and porosity. These effects are highlighted using the following formula,

160

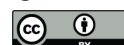

$$r(i, e, \alpha, \lambda) = K \frac{\omega(\lambda)}{4} ( [1 + B(\alpha)]P(\alpha) + M(i, e, \alpha, \lambda) - 1 ),$$

(1)

where  $r(i, e, \lambda)$  is the scattering intensity (radiance);  $K$  is the filling factor (linked to porosity; Hapke, 2008);  $(\lambda)$  is the average single scattering albedo (SSA; linked to absorption and scattering at particle level and dependent on the wavelength  $\lambda$ );  $B()$  is the opposition surge function (Hapke, 1993, 1986);  $P()$  is the average single scattering function for the phase angle;  $i$  and  $e$  are the angles of incidence and emission;  $M(i, e, \lambda)$  represents the wavelength-dependent multiple scattering effect (MSE). It is important to note that Hapke's refers to 'scattering' as an integration of all radiation emitted by a surface following interactions with an excitation source, with no distinction between surface and volume processes. Instead, the models provide a holistic approach in which multiple terms are influenced by both surface and volume processes. In this context, radiance is thus the total signal scattered by an object towards a detector. In hyperspectral remote sensing, the distinction between surface and volume scattering contributions is important, as surface and subsurface rock characteristics are linked to changes in the reflectance spectra (cf., section 2.1).

The single and multiple scattering terms (SSA and MSE) are the primary contributors to the reflectance estimated by the model. Whilst SSA represents the probability of light being scattered or absorbed by a single grain, MSE (derived from Ambartsumian-Chandrasekhar H-function and dependent on SSA) accounts for multiple scattering prior to its emission towards a detector. Both parameters are material-specific, and vary according to changes in roughness, grain size, and wavelength of light. Another core term is the phase function  $P()$ , which estimates how much light is scattered in a given direction relative to the direction of incoming light as a function of the angle between the illumination direction and the viewing direction (phase angle,  $\alpha$ ). The intensity and direction of the phase function are not material-specific, but also depends on roughness, grain size and wavelength. The opposition surge term  $B()$  is also linked to  $\alpha$ , and introduces a surface brightening effect as  $\alpha$  decreases (Hapke, 2002). Finally, the porosity parameter  $K$  accounts for changes in scattered signals due to increasing porosity and/or decreasing density (Hapke, 2008).

To summarise, Hapke's models provide an important tool to understand the link between hyperspectral reflectance spectra and sample roughness, grain size, porosity and composition. It is based on radiative transfer theory and traditionally used to describe the scattering of light by planetary surfaces. It estimates the bidirectional reflectance of a surface, considering both single and multiple scattering of light. The model can be tuned for specific application, and generally incorporate parameters such as single-scattering albedo, phase function, and surface roughness which have a direct impact on the bidirectional reflectance signals. Hapke's model is therefore a strong basis for understanding the interaction of light with rock surfaces, aiding in the interpretation of remote sensing data. While the complexity of real samples typically limits the model's practical application, it provides a useful theoretical framework that will help us to understand and interpret hyperspectral reflectance spectra.





194

## 195 3 Methods

### 196 3.1 Sample database

197 For this study, we compiled a new database of individual, well-characterised core samples that have been subjected to  
198 laboratory rock deformation experiments (Heap et al., 2021a, 2020a; Leiter et al., 2024; Schaefer et al., 2023; Tramontini et  
199 al., 2025; Vairé et al., 2024). These samples were collected in the scope of previous studies from basaltic to rhyolitic  
200 composite volcanoes, including Cracked Mountain (Canada; Leiter et al., 2024), Ruapehu (New Zealand; Schaefer et al.,  
201 2023), La Soufrière de Guadeloupe (Eastern Caribbean; Heap et al., 2021b, 2021a), Ohakuri (New Zealand; Heap et al.,  
202 2020a), Chaîne des Puys (France; Vairé et al., 2024), Copahue (Argentina/Chile; Tramontini et al., 2025), Tongariro (New  
203 Zealand; Kidd et al., 2025), and Whakaari (New Zealand; Kidd et al., 2025).

204 Most of the sampled rocks are basaltic to andesitic in composition, and cover a range of textures (breccias, pyroclastic, and  
205 coherent lava rocks). A breadth of hydrothermal alteration is also covered, ranging from dominantly fresh rocks (e.g., from  
206 Chaîne des Puys; Vairé et al., 2024) through to intense hydrothermal alteration (e.g., some samples from Ruapehu and  
207 Whakaari; Schaefer et al., 2023). Altered samples in our sample set were subject to acid-sulphate related mineralogical  
208 changes, including the formation of sulphates (e.g., jarosite, alunite and anhydrite), phyllosilicates (e.g. kaolinite and  
209 montmorillonite), and various polymorphs of quartz (Heap et al., 2021a; Kereszturi et al., 2020). This diversity of alteration  
210 is intended to help our machine learning models to learn some of the alteration systematics and capture how these can  
211 influence the physical and mechanical properties of volcanic rocks.

### 212 3.2 Laboratory testing

213 Mechanical test cores were prepared with a diameter of 20 mm and a length of ca. 40 mm. Measurements and experiments  
214 were either performed at University of Strasbourg (France) or University of Canterbury (New Zealand). Prior to testing, the  
215 samples were dried in a vacuum oven at 40 °C for a minimum of 48 hours (Strasbourg) or oven-dried at 60 °C for a  
216 minimum of 48 hours (Canterbury). Dry bulk density was calculated using the dry mass and bulk volume of each sample.  
217 Connected porosity was calculated using the skeletal volume, measured using an AccuPyc II 1340 pycnometer (Strasbourg  
218 and Canterbury), and the bulk volume of each sample.

219 Uniaxial compressive strength (UCS) experiments were performed using a uniaxial load frame supplied by Schenk  
220 (Strasbourg) or a 3000 kN Technotest uniaxial load frame (Canterbury). All experiments were performed on dry samples at  
221 ambient laboratory temperatures. Samples were deformed at a constant strain rate of 10<sup>-5</sup> s<sup>-1</sup> until macroscopic sample  
222 failure (Fig. 2a). Axial displacement and axial force were measured by a linear variable differential transducer and a load  
223 cell, respectively, and were converted to axial strain and axial stress using the initial length and radius of the sample,



224 respectively. More information, as well as schematic diagrams of the devices, can be found in Heap et al. (2014) and  
225 Mordensky et al. (2018).

226 First, the maximum stress of each loading curve was identified as the UCS. The pre-failure loading curve was then smoothed  
227 slightly using a Savitzky–Golay filter and resampled to regular stress increments using a linear interpolation. The slope of  
228 the most linear part of the resampled loading curve was then identified to calculate  $E$ , using the random sample and  
229 consensus (RANSAC) algorithm. This regression technique robust to outliers iteratively fits data with a function (in this case  
230 a linear) using random minimal subsets (two points) and maximises the number of inliers within a threshold distance. This  
231 approach successfully identifies the linear part of each loading curve while remaining robust to outliers caused by pre-failure  
232 inelastic deformation by maximising the number of inliers (rather than minimising residuals as per e.g., least-squares  
233 regression, Fig. 2c), allowing robust and objective measurement of  $E$ .

234

### 235 3.3 Hyperspectral data acquisition

236 A total of 332 individual core samples were compiled from eight basaltic to andesitic volcanoes and arranged on  
237 non-reflective sample trays (Fig. 2a). These samples were grouped by size to limit focal blur, fixed in place using plasticine  
238 and leveled to reduce illumination artifacts. Each tray was then scanned using a Specim SiSuROCK drill core scanner, which  
239 contains Specim AisaFENIX, FX50 and AisaOWL hyperspectral sensors and a high spatial Specim RGB-Jai camera (Fig.  
240 2b). The workflow described by Thiele et al. (2024) was used to coregister data from each of the sensors and to convert from  
241 measured radiance to relative reflectance.

242 Each sample was then extracted from the coregistered stack of hyperspectral (and RGB) imagery using napari-hippo (Thiele  
243 et al., 2024), and stored as a separate set of images. The spectra of each image was smoothed slightly with a Savitzky–Golay  
244 filter (using a 1st order polynomial and window size of 5 bands), and hull-corrected using hylite (Thiele et al., 2021) to  
245 amplify spectral absorption features and reduce illumination artifacts caused by non-planar sample geometries. VNIR to  
246 MWIR spectra were corrected using an upper hull correction, while a lower hull correction was applied to the LWIR range  
247 data.

248 Median spectra from each mechanical test sample were then compiled into a spectral library covering the  
249 VNIR-SWIR-MWIR-LWIR range. These were combined with the corresponding mechanical property measurements to  
250 derive a training dataset.

251 Their mineralogy was characterised by indices extracted from the spectra of each sample using the minimum wavelength  
252 mapping approach (van der Meer et al., 2018) implemented in hylite (Thiele et al., 2021). These indices (Table 1) quantify  
253 specific spectral absorptions resulting from vibrational and bending vibrations associated with water, sulfate, hydroxylated  
254 phyllosilicates, and silicate minerals (Laukamp et al., 2021; Schodlok et al., 2016). Two composite indices were also  
255 calculated, to characterize bulk-composition and the extent of hydrothermal alteration. The first is the Mafic-Felsic Index of  
256 Schodlok et al., (2016), which distinguishes samples with basaltic compositions from those that are more evolved. This





index, hereafter referred to as MFI, was computed by applying a lower-hull correction to the LWIR spectra between 7640 and 10620 nm and identifying the general position (wavelength) of the reflection peak within this range, using the polynomial fitting approach implemented in hylite (Thiele et al., 2021). The results were then normalized to range between 0 (maxima at 10620 nm, indicating mafic compositions) and 1 (maxima at 7640 nm, indicating felsic compositions).

The second bulk index was derived by averaging the H<sub>2</sub>O and OH absorptions at ~1900 and 1400 nm (Table 1), to track the total amount of water (as H<sub>2</sub>O, in e.g. quartz-hosted fluid inclusions, and as -OH groups in e.g., clay minerals). Because most of the measured volcanic rocks are initially dry (with some exceptions, e.g., phreatomagmatic tuff), this water often indicates hydrothermal alteration. We thus use this index as a rough proxy for hydrothermal alteration (and weathering) processes. The presence of hydrated (alteration) minerals has been shown to correlate with mechanical response (Heap et al., 2022).

### 3.4 Regression models

Each target variable (density, porosity, UCS, and E) requires transformation prior to model fitting, to reduce skew (Fig. 3) and ensure the back-transformed predictions are correctly scaled (non-negative and, in the case of porosity, between 0 and 1). A square root transform (Fig. 3e) was found to perform better than a log-transform (Fig. 3f), likely as it resulted in more normally distributed data. Porosity was converted to a ratio of voids to solids (1 - porosity) prior to the square root transform, mitigating challenges fitting regressions to closed data.

We ensure a robust calibration/validation by defining five folds using a stratified split with respect to porosity, to ensure that each fold contains diverse mechanical properties. Several machine learning approaches (lasso regression, partial least square regression, support vector regression, and multilayer perceptron regression), known to be adapted to this genre of tasks, were then evaluated using the R<sup>2</sup> metric and 5-fold cross validation (to account for potential overfitting). Model hyperparameters were optimised to maximise the training R<sup>2</sup> score, as documented in the Jupyter notebooks included in the supplementary material. Finally, the best models were combined into an ensemble, allowing the prediction variance to be used as a measure of uncertainty.

### 3.5 SHAP analysis

Shapley values (Shapley, 1973) have recently been adapted to help understand the predictions made by deep learning models. Based on cooperative game theory, Shapley values quantify the contribution of individual features to output predictions, providing a theoretically grounded measure of the average marginal contribution of each input feature across all possible feature subsets (Lundberg and Lee, 2017). This allows a more detailed interpretation than other explanation approaches, and in this case helps link model predictions to specific hyperspectral bands.

We used the python package SHAP (Shapley Additive Explanations; Lundberg and Lee, 2017) to compute Shapley values for our ensemble models. Due to the various types of models included in these ensembles, a stochastic estimation approach



(KernelSHAP) was used. KernelSHAP is a model-agnostic algorithm that estimates Shapley values by systematically perturbing input variables and measuring the resulting changes. The perturbative nature of this algorithm makes it computationally expensive, requiring us to compute Shapley values only for a subset of our test dataset. This subset was selected using k-means clustering, such that 16 representative data points (cluster centroids) could be selected for use by the Kernel Explainer.

## 4 Results

### 4.1 Spectral response of hydrothermal alteration

A comparison of MFI, a proxy for composition, and hydration index, a proxy for hydrothermal alteration, highlights the spectral diversity of our dataset (Fig. 4). Two broad populations of basalt (lower) and andesite (upper) form clear horizontal “bands”, each of which contains variable amounts of hydration. The MFI results broadly match the expected composition of each volcano, albeit with exceptions including two altered samples from Whakaari with anomalously low MFI (due to the confounding influence of non-silicate alteration minerals like jarosite or sulphur, rather than a mafic composition).

Diagnostic absorption features for kaolinite ( $v+\delta\text{M2OH}$ ) and other clay minerals ( $v+\delta(\text{Al})\text{-OH}$  and  $v+\delta(\text{Mg})\text{-OH}$ ) are prominent in many altered samples. Of these, the kaolinite-rich samples (Fig. 4e) tended to be associated with deeper  $2\nu\text{Si-O}$  absorptions in the MWIR range (at  $\sim 4500$  nm and indicative of silicification) or  $\delta\text{S-O}$  absorptions in the SWIR range (at  $\sim 1750$  nm), indicating silicification and/or the presence of sulphate minerals like jarosite and alunite. In combination, these spectral features indicate advanced argillic alteration, and are mostly associated with higher (andesitic) values of MFI (as our dataset currently lacks basaltic examples of advanced argillic alteration).

Many samples also contain well defined  $v+\delta(\text{Al})\text{-OH}$  absorption features (Fig. 4a), but without the previously mentioned kaolinite, sulphate, or quartz-related absorption features. These are indicative of illite and smectite group clay minerals formed by lower-temperature ( $<120^\circ\text{C}$ ) and/or higher pH hydrothermal alteration or weathering. Many of the basaltic samples (lower MFI) also contain distinctive  $v+\delta(\text{Mg})\text{OH}$  absorption features at 2300 nm, while lacking the  $v+\delta(\text{Al})\text{-OH}$  feature (Fig. 4b). We interpret this as either primary Al-poor clays (e.g., in palagonite tuffs), or as the result of argillic alteration or weathering in Al-poor primary lithologies to form Fe- and Mg- rich clay minerals, like nontronite and hectorite. Notably, all samples with spectral absorptions indicative of hydrothermal alteration also had prominent  $\nu\text{OH}$  and  $\nu\text{OH}+\delta\text{H}_2\text{O}$  absorptions at  $\sim 1400$  and 1900 nm. This suggests that these combined features (our hydration index) can be used to broadly quantify the intensity of hydrothermal alteration, because primary volcanic lithologies tend not to contain hydrated or hydroxylated phases. Samples with higher hydration indices tended to be less dense (Fig. 5a) and have lower UCS and E (Fig. 5c–d) than counterparts with lower hydration indices. Porosity showed a more complex relationship to the hydration index (Fig. 5b), with a distinctive set of highly porous but non-hydrated samples (vesiculated lavas), and highly porous and hydrated samples.



## 4.2 Rock property prediction

The tested machine learning models gave a wide range of prediction accuracies, with highly varied 5-fold cross-validation R<sup>2</sup> scores (Table 2). Linear models (PLSR and Lasso) performed poorly, suggesting a highly non-linear relationship between spectral response and rock properties (Table 2). Support Vector Regression (SVR) and Multilayer Perceptron (MLP) models were able to learn the nonlinear relations, yielding 5-fold cross validated R<sup>2</sup> scores between 0.5 and 0.85 for each of the rock properties. Deeper multilayer perceptrons (with 8 to 16 fully connected layers) performed best. The need for depth further emphasises the need to capture nonlinear links in the underlying data structure and modelling.

Models fit to principal component (PCA) transformed inputs (retaining 25 independent features), including the MLP models that theoretically work well with high-dimensionality input, performed better than models fit directly to concatenated spectra.

No substantial difference in accuracy was observed between MLP models predicting a single output (i.e. univariate MLP models that predict a single rock property) and multivariate MLP models (that predict each of the four rock properties together). Ensemble predictions computed by averaging outputs from a set of nine manually selected (best-performing) SVM and MLP models show similar or slightly improved R<sup>2</sup> scores (relative to the individual models). However, these ensemble models allow an estimate of prediction uncertainty (Fig. 6), based on the standard deviation ( $\sigma$ ) of the individual model predictions. In most cases the measured rock property was within  $2\sigma$  of the ensemble mean, though several notable outliers can also be identified. These include the prominently under-predicted UCS for one sample from Ruapehu (156 rather than 380 MPa), and over-estimated E for several samples from Ruapehu and Whakaari.

Interestingly, models trained and tested on the basaltic samples achieved higher R<sup>2</sup> scores than equivalents trained and tested on andesitic ones (Table 2). This implies that the rock properties of basalts (in our dataset) were easier to predict than andesites, possibly due to the variability of the hydrothermally altered andesite relative to the basalts (which were mostly fresh or palagonitized).

## 4.3 Important spectral ranges

Shapley values calculated for our ensemble predictions were aggregated to explore the contribution of each spectral range (Fig. 7). The results suggest the VNIR-SWIR range contributes most to predictions of density, UCS, and E that are below the expected (average) prediction, while the LWIR range makes a substantial contribution for above-average predictions. The opposite can be seen for porosity, where VNIR-SWIR bands mostly drive above average predictions. This indicates that the models learn to associate SWIR-active alteration minerals with reduced UCS, E, and density (and associated porosity increase).

Per-band Shapley values can also constrain the specific spectral features that, in combination, contribute to each prediction. To reduce the influence of lithological effects, these per-band Shapley values were calculated for models trained only on the basaltic and andesitic subsets (Fig. 8). The results highlight a sensitivity to spectral ranges matching the expected



352 mineralogical absorptions, though it is striking that the informative bands tend to occur on the absorption “shoulders” rather  
353 than their centres (Fig. 8).

354 Strongly negative Shapley values are associated with 1800, 1900, and 2200 nm bands, which contain absorptions  
355 characteristic of hydrothermal alteration minerals (Table 1) for samples with low predicted E. Higher predictions also appear  
356 driven by these same bands, presumably due to an absence of absorption features in these wavelengths for these samples. In  
357 the MWIR, features at ~3400 and between 4200 and 4900 nm appear important, with several “doublets” (spectrally adjacent  
358 high and low Shapley values) indicating a **sensitivity absorption shape** (asymmetry) or position. The first of these bands  
359 (3400 nm) is likely related to v2HOH absorptions (though will have been quite distorted by the hull correction applied  
360 during pre-processing). The latter bands (4200–4900) are interpreted to relate to 2vSi-O absorptions from silicate minerals or  
361 2vS-O absorptions from sulphates (Laukamp et al., 2021), though the last of these (4900) may also have been shifted by the  
362 hull correction.

363 Notably, many more VNIR, SWIR, and MWIR bands appear important for predictions made by the andesitic model than the  
364 basaltic one, presumably due to the more complex mineralogy of these samples. Informative bands in the LWIR range  
365 between 8500 and 11000 nm and also likely relate to vSiO absorptions, though the mixtures of silicate minerals and glassy  
366 matrix make these difficult to interpret specifically (Laukamp et al., 2021; Leight et al., 2024; Williams and Ramsey, 2024).  
367 Informative bands for the andesite model are lower wavelength (8500–9200 nm) than those for the basaltic model  
368 (8800–9800 nm), corroborating the change in silica polymerization between these sample sets.

## 369 5 Discussion

370 Our five-fold cross validated ensemble predictions show that hyperspectral data can be used to explain ~80% of the variance  
371 in density and porosity and 65–70% of the variance in strength (UCS) and Young’s modulus (E), at least for the investigated  
372 basaltic and andesitic volcanic lithologies. The rapid acquisition and imaging abilities of hyperspectral sensors could thus be  
373 leveraged to better characterise complex volcanic rock masses, by extending laborious rock property measurements across  
374 large datasets from point spectrometers, hyperspectral core scanners and, potentially, outcrop hyperclouds (e.g., Thiele et al.,  
375 2024, 2022). The resulting thousands to millions of (ideally spatially continuous) property estimates would allow robust  
376 characterisation of the variability in volcanic rock matrix properties and, if combined with digitally mapped fracture  
377 information, provide some of the information needed to numerically predict larger-scale rock-mass properties (e.g., Cundall  
378 et al., 2008).

### 379 5.1 Predicting density and porosity

380 Our predictions of density and porosity were remarkably accurate (5-fold CV R2 score of 0.81 and 0.84 respectively),  
381 especially given the complex volcanic processes that influence these properties (vesiculation, pyroclastic processes,  
382 alteration, and fracturing). Interestingly, linear methods such as LASSO and PLSR predicted density and porosity poorly



(Table 2), while the non-linear methods (MLP and SVR) achieved  $R^2$  scores  $>0.8$ . This suggests an inherently non-linear relationship between reflectance, density, and porosity. The high accuracies of the non-linear models also indicate that they are able to learn more than just the link between the hyperspectral data and mineralogy, as composition alone is expected to be a poor predictor of porosity (Pola et al., 2012). We thus suggest that the hyperspectral data contain information on porosity and density via the sensitivity of volume and surface scattering processes to pores at or near the sample's surface (Fig. 1). As described by the Hapke model, such wavelength-dependent scattering effects are likely especially relevant for longer wavelengths, supporting the Shapley values that show the LWIR data contributed significantly to many predictions (Fig. 7). Larger vesicles that approach the 1 to 2 mm spatial resolution of the sensors could also influence the spectra, via the cavity effect (Fig. 1), especially in the LWIR infrared range (where they are expected to reduce reflectivity and increase the emissivity).

Our Shapley values highlight the important role of MWIR and LWIR bands, especially for high-density and low-porosity samples (Fig. 7). It is also striking that the VNIR-SWIR and LWIR ranges tend to be in opposition (cancelling each other out) for less extreme predictions (Fig. 7), emphasising the importance of the broad spectral range (VNIR-SWIR-MWIR-LWIR) covered by the dataset. The special attention our machine learning models appear to be giving to the shoulders of mineralogical absorption features (rather than their minima, which are typically related to composition) is also noteworthy. We tentatively suggest that this highlights the sensitivity of our models to the shape and asymmetry of absorption features, properties that are more significantly influenced by surface reflection and volume scattering processes that likely give crucial information on surface roughness, grain size, and porosity.

## 5.2 Predicting uniaxial compressive strength and Young's modulus

The lower, but still informative, predictive power of our models for UCS and E indicates a complex relationship between spectral response, porosity, density, and alteration-related weakening (Heap et al., 2020a, or possibly strengthening in the case of silicification; Heap et al., 2021a). These non-linear models can explain  $\sim 70\%$  of the total variance, noting that the  $R^2$  scores are likely substantially reduced by a small number of outliers (Fig. 6). This result is consistent with the combined models of Kereszturi et al. (2023), in which externally measured porosity and VNIR-SWIR information (characterising alteration mineralogy) explained 80% of the variance in UCS. We suggest that externally measured porosity was needed by Kereszturi et al. (2023) due the lack of LWIR information, which limited their ability to directly predict porosity from the hyperspectral data ( $R^2 = 0.4$ ). Our dataset clearly did not have this limitation (Section 5.1), indirectly improving also our predictions of UCS.

Theoretical links between reflectance spectra and grain size properties could further influence our machine learning models, although we are unable to distinguish these effects from the previously discussed sensitivity to porosity. We also speculate that it is likely the model is learning to distinguish glass-rich (and hence stiff and brittle) samples from more crystallised ones, based on their distinctive LWIR expression (Williams and Ramsey, 2024). The sensitivity to glass could explain the broad informative wavelength range indicated by the Shapley values in the LWIR (Fig. 8).



The remaining (unpredicted) variance in UCS and E could be attributed to micro-fractures, which will serve to reduce E and UCS (Griffiths et al., 2017; Swanson et al., 2020; Takemura et al., 2003) with negligible spectral effect. Such fractures could, for example, explain overpredicted outliers in Figs. 6 and 8. Micro-fractures are less likely to explain cases where our model makes under-predictions however, including the notable outlier in Fig. 6c where the predicted UCS is ~250 MPa too low.

### 5.3 Hyperspectral quantification of hydrothermal alteration

VNIR-SWIR hyperspectral data are particularly useful for identifying hydrothermal alteration, discriminating between different alteration types, and vectoring towards mineral deposits (e.g., Cudahy et al., 2008; Laukamp et al., 2021, 2011; Portela et al., 2021). Argillic and advanced argillic alteration can be characterised based on the distinctive spectral signature of sulphates, kaolinite, and other clay minerals (Fig. 4). This could be further refined by detailed investigation of the position of these respective absorption features, to distinguish between e.g., kaolinite and dickite or illite and smectite (e.g., Kereszturi et al., 2020; Simpson and Rae, 2018).

Our results also show that the combined depth of  $\nu$ -OH and  $\nu$ + $\delta$ H-O-H absorptions can be used as a broad but useful proxy for hydrothermal alteration in non-weathered crystallised volcanic rocks, as these lithologies tend to be initially water poor. That said, this index likely cannot identify hydrothermal alteration in tuff units, which can be hydrated during or shortly after formation (e.g., palagonite). Our hydration index shows a weak correlation with physical and mechanical properties (Fig. 5), with substantial unexplained variance that emphasises the important additional influence of microstructure (porosity, grain-size, glass content, and micro-fractures).

### 5.4 Applications and future directions

Unlike other commonly applied proxies for physical and mechanical rock properties (e.g., Schmidt hardness, field estimates for porosity, etc.), hyperspectral data can be collected remotely using imaging techniques. This imaging capability unlocks several intriguing possibilities.

Firstly, our machine learning models could be applied to hyperspectral imagery of hand-sample sized specimens acquired during geotechnical fieldwork to create prior predictions of their physical and mechanical property variability. The locations of extracted mechanical test cores could then be optimized to cover the range of expected variability, improving the statistical representativity of the resulting data. Such an approach would provide an opportunity to independently validate our model predictions, and provide training data for future refinements, while helping ensure statistically representative characterisation of heterogeneous rock masses.

Secondly, imaging hyperspectral sensors can also be deployed on tripod, crewed, and uncrewed aircraft to remotely capture ~1 to 10 cm resolution data over large areas of exposed rock. This resolution is comparable to the scale of laboratory tests for physical and mechanical properties, but with a large spatial extent that could enable detailed rock-mass characterisation, through the integration of remotely estimated physical and mechanical property estimates, remotely mapped fracture



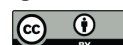

information (e.g., Dewez et al., 2016; Thiele et al., 2017), and numerical simulation techniques (e.g., Cundall et al., 2008; Ivars et al., 2007). Further development and the acquisition of a larger, more diverse training database is undoubtedly needed before our models can be applied to such “outcrop” settings, due to the lower-quality of hyperspectral data acquired outside of laboratory conditions (where sub-optimal illumination and atmospheric scattering can be problematic) and the variety of weathering processes that can influence outcrop surfaces. However, the required sensors and acquisition techniques already exist, suggesting cm-scale mapping of outcrop physical and mechanical properties is, with appropriate site-specific calibration and validation, achievable.

## 6 Conclusions

Our machine learning models demonstrate that hyperspectral data can be used as a proxy for the physical and mechanical properties in the sampled andesitic and basaltic volcanic rocks, with cross validated  $R^2$  scores of 0.7 to 0.8. Physical properties, mechanical behaviour, and reflection spectra are influenced by a complex combination of primary and secondary (alteration or weathering) mineralogy, glass content, porosity, grain size, and surface roughness. Disentangling the influence of these properties on spectral reflectance (for complex mixtures; i.e. rocks) remains challenging but our findings demonstrated that machine learning techniques can be used to find informative relationships between spectral and physical and mechanical properties. Further work is required to assess how robust these predictions are, and if they can be generalised or are best applied after site-specific training. We are confident that our results (and other recent work by e.g., Bakun-Mazor et al., 2024; Kereszturi et al., 2023) underpin how hyperspectral data can serve as informative and easy-to-acquire proxy for physical and mechanical properties of volcanic rocks.

466

**Table 1: Spectral indices used to spectrally characterize our samples. Absorption features are classified according to the notation of Laukamp et al., (2021), denoting stretching-related absorptions with  $\nu$  and bending-related absorptions with  $\delta$ , and were quantified by fitting an asymmetric gaussian to the specified spectral range and recording its amplitude as a measure of absorption depth. This fitting was conducted using hylite (Thiele et al., 2021), and included a hull correction step to remove spectral features broader than the target range.**

| Short name       | Target                                  | Spectral range (nm) | Indicator for                                                                                  |
|------------------|-----------------------------------------|---------------------|------------------------------------------------------------------------------------------------|
| H <sub>2</sub> O | $\nu\text{OH}+\delta\text{H}_2\text{O}$ | 1800–2120           | Molecular water in e.g., clay minerals.                                                        |
| OH               | $\nu\text{OH}$                          | 1350–1600           | Hydroxyl groups in clay minerals and hydroxylated sulfates (kaolinite, alunite, illite, etc).  |
| Al-OH            | $\nu + \delta(\text{Al})\text{-OH}$     | 2150–2240           | Hydroxyl groups in Al-rich phyllosilicate minerals including illite, smectite, kaolinite, etc. |
| Mg-OH            | $\nu + \delta(\text{Mg})\text{OH}$      | 2280–2330           | Hydroxyl groups in Mg-bearing phyllosilicate, like Mg-rich smectites (e.g., hectorite).        |
| SO <sub>4</sub>  | $\delta\text{SO}$                       | 1700–1800           | Indicator for the presence of sulfate-bearing minerals,                                        |

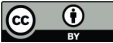

|                               |                    |           |                                                                                                                                                                                                          |
|-------------------------------|--------------------|-----------|----------------------------------------------------------------------------------------------------------------------------------------------------------------------------------------------------------|
| including gypsum and alunite. |                    |           |                                                                                                                                                                                                          |
| Silica                        | vSiO               | 4400–4600 | Indicator for quartz or amorphous silica via the second overtone SiO absorption. This was used (rather than the LWIR feature) to avoid interference with plagioclase.                                    |
| Kaolinite                     | v + $\delta$ M2OHo | 2100–2200 | Depth of the v + $\delta$ (Al)-OH related doublet typical of kaolinite group minerals. Note that the hull correction applied prior to fitting removes the influence of the deeper absorption at 2200 nm. |

472

473 Table 2: Five-fold cross validated R2 scores for the machine learning approaches trained and tested on: (1) basaltic (MFI < 0.4), (2)  
474 andesitic (MFI > 0.4), and (3) combined subsets. The best R2 scores for each property are indicated in bold. The ensemble models  
475 were constructed by combining the best-performing SVR and MLP models.

|                            | Lasso | PLSR | SVR  | MLP (uni)   | MLP (multi) | Ensemble    |
|----------------------------|-------|------|------|-------------|-------------|-------------|
| <b>Density</b>             | 0.39  | 0.51 | 0.76 | 0.82        | <b>0.85</b> | 0.84        |
| <i>Density (basalt)</i>    | 0.5   | 0.47 | 0.77 | 0.75        | <b>0.83</b> | 0.78        |
| <i>Density (andesite)</i>  | 0.32  | 0.47 | 0.79 | <b>0.85</b> | 0.83        | 0.84        |
| <b>Porosity</b>            | 0.33  | 0.48 | 0.74 | 0.79        | <b>0.81</b> | 0.81        |
| <i>Porosity (basalt)</i>   | 0.39  | 0.49 | 0.77 | 0.73        | <b>0.81</b> | 0.76        |
| <i>Porosity (andesite)</i> | 0.31  | 0.49 | 0.74 | 0.80        | 0.77        | <b>0.80</b> |
| <b>UCS</b>                 | 0.21  | 0.18 | 0.59 | <b>0.69</b> | 0.66        | 0.67        |
| <i>UCS (basalt)</i>        | 0.56  | <0   | 0.76 | <b>0.76</b> | 0.75        | 0.75        |
| <i>UCS (andesite)</i>      | 0.1   | <0   | 0.57 | <b>0.67</b> | 0.67        | 0.66        |
| <b>E</b>                   | 0.30  | 0.36 | 0.65 | 0.67        | 0.67        | <b>0.70</b> |
| <i>E (basalt)</i>          | 0.44  | 0.41 | 0.68 | 0.73        | <b>0.75</b> | 0.73        |
| <i>E (andesite)</i>        | 0.31  | 0.41 | 0.64 | 0.62        | 0.62        | <b>0.65</b> |

476

477

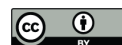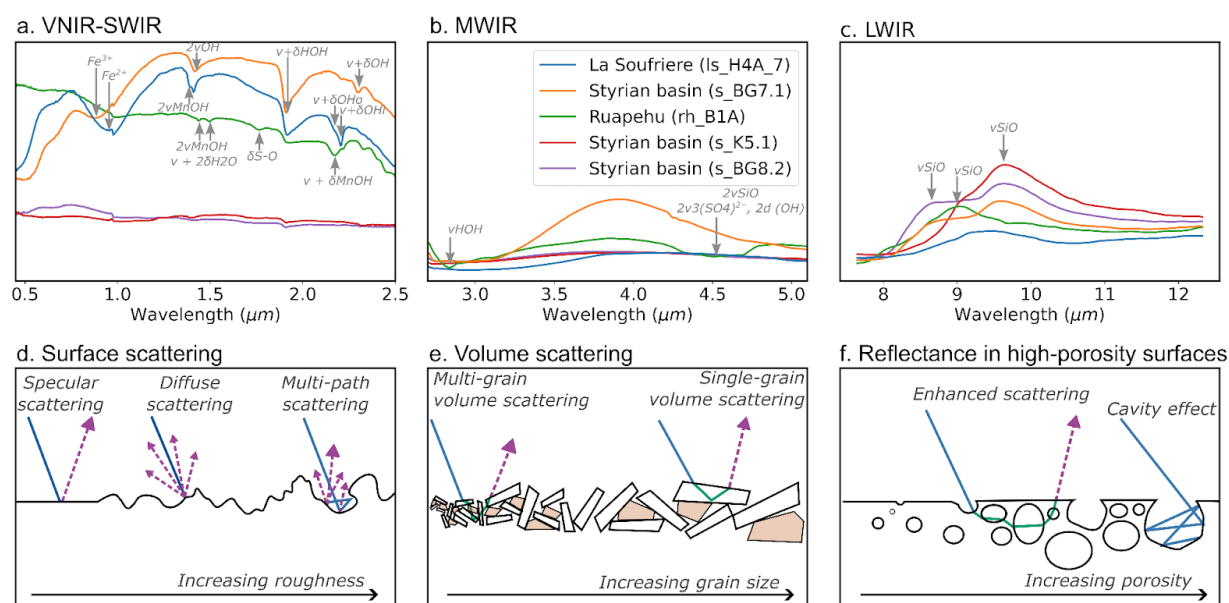

478

479 **Figure. 1: Mineralogical and physical controls on hyperspectral reflectance spectra. Examples of absorption features caused by**  
 480 **minerals commonly found in volcanic rocks are shown for the VNIR-SWIR (a), MWIR (b) and LWIR (c) ranges, as described in**  
 481 **depth by Laukamp et al., (2021). Typical surface (d) and volume scattering (e) interactions are shown, highlighting the effect of**  
 482 **increasing surface roughness and grain size. An example of how these processes operate simultaneously, and are both strongly**  
 483 **influenced by porosity, is shown in (f). Note that these are all wavelength dependent, especially where the wavelength of light**  
 484 **approaches the scale of variation.**

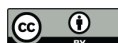

a. Broken UCS samples

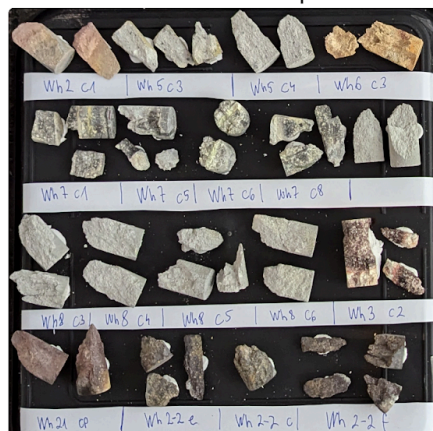

b. SiSuROCK hyperspectral scanner

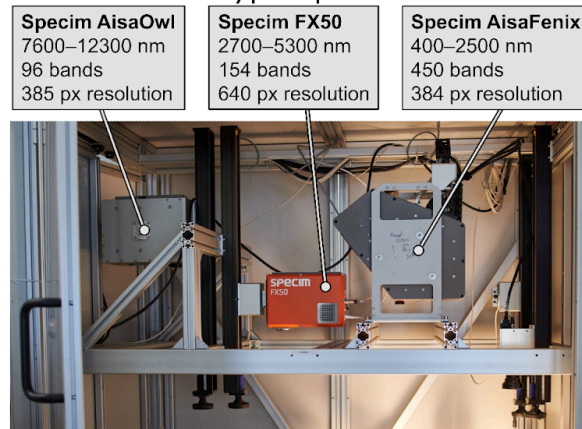

c. Loading curve with fitted UCS and E

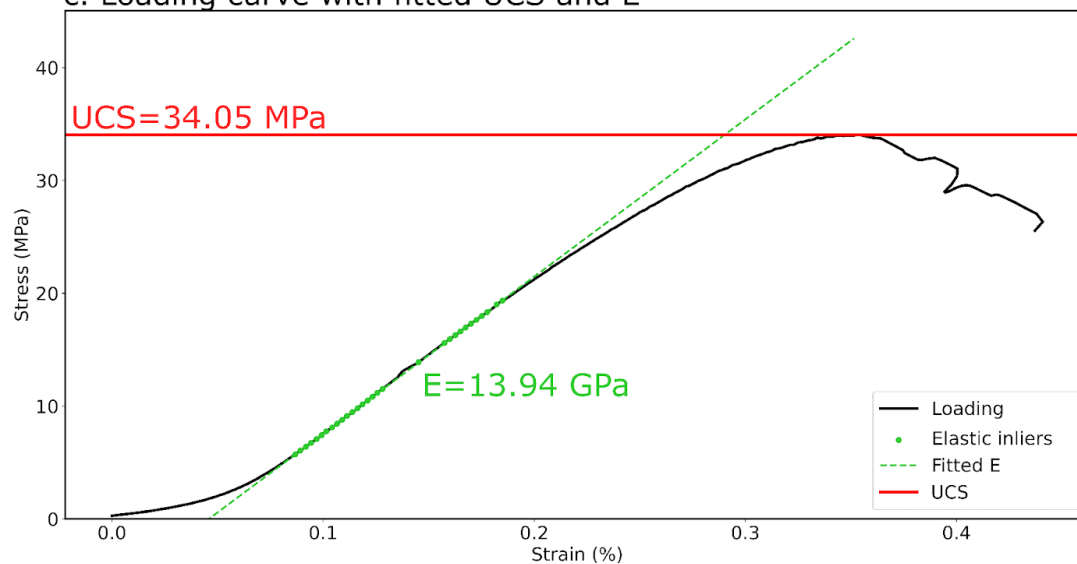

485

486 Figure 2: Post-failure uniaxial compressive strength (UCS) test cores (a) prior to scanning in a SiSuROCK hyperspectral drillcore  
487 scanner (b). UCS and Young's modulus (E) were extracted from the corresponding stress-strain curves (c) using an automated  
488 RANSAC-based procedure, for direct comparison with the (averaged) sample spectra.

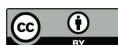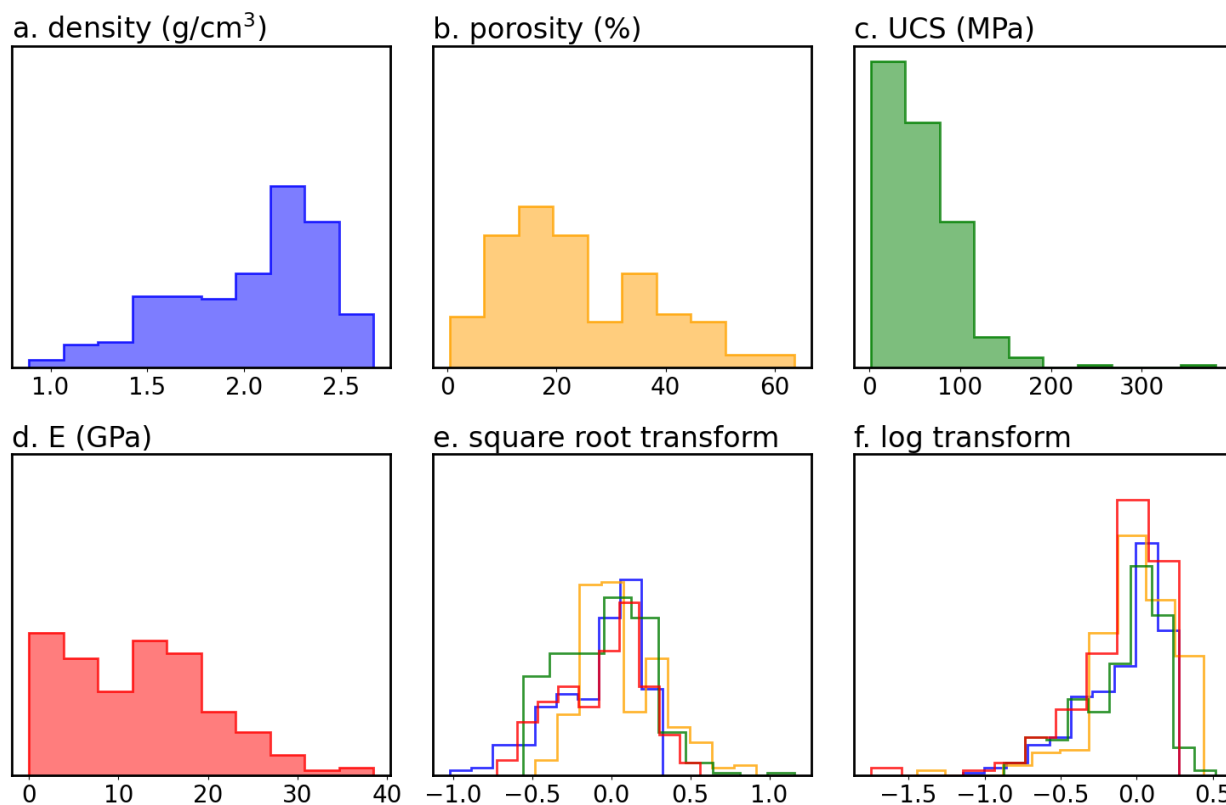

489

490 Figure. 3: Distributions of the training data before (a-d) and after square root (e) and log (f) transformation. Note that  
 491 transformed data was normalised to have a median of 0 and 2nd to 98th percentile range of 1. The square root transform (e)  
 492 resulted in approximately normal distributions.

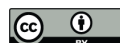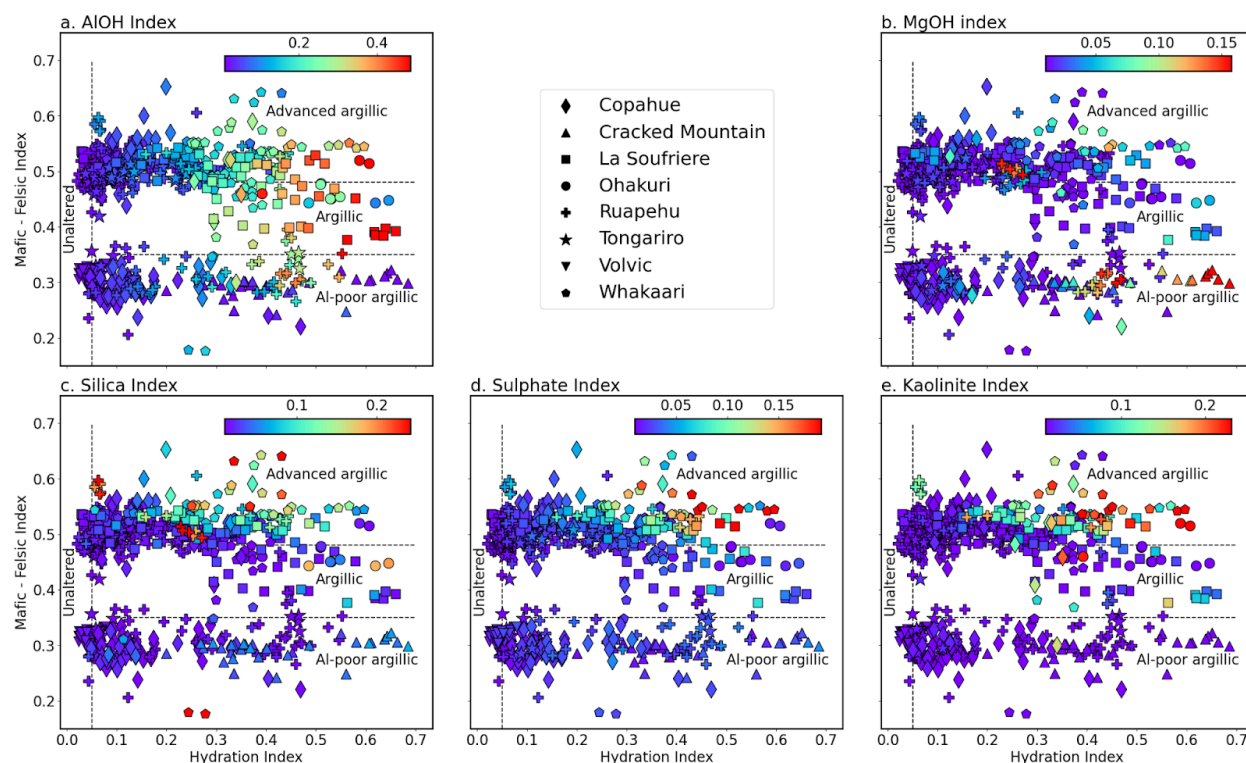

493

494 **Figure 4: Measured hydration index (x-axis) and Mafic-Felsic Index (MFI; y-axis), coloured by hyperspectral indices for Al-OH**  
 495 **bearing phyllosilicates (a), Mg-OH bearing phyllosilicates such as hectorite (b), quartz (c), sulfate (d), and kaolinite (e). The two**  
 496 **main clusters indicate the broadly basaltic (lower) or andesitic (upper) composition of the samples, while hydrothermal alteration**  
 497 **(and/or surface weathering) results in significant scatter along the x-axis. Distinctive Al-OH and Mg-OH (clay) rich zones indicate**  
 498 **argillic alteration, while samples with elevated sulfate and kaolinite indices were likely subject to advanced argillic alteration.**



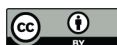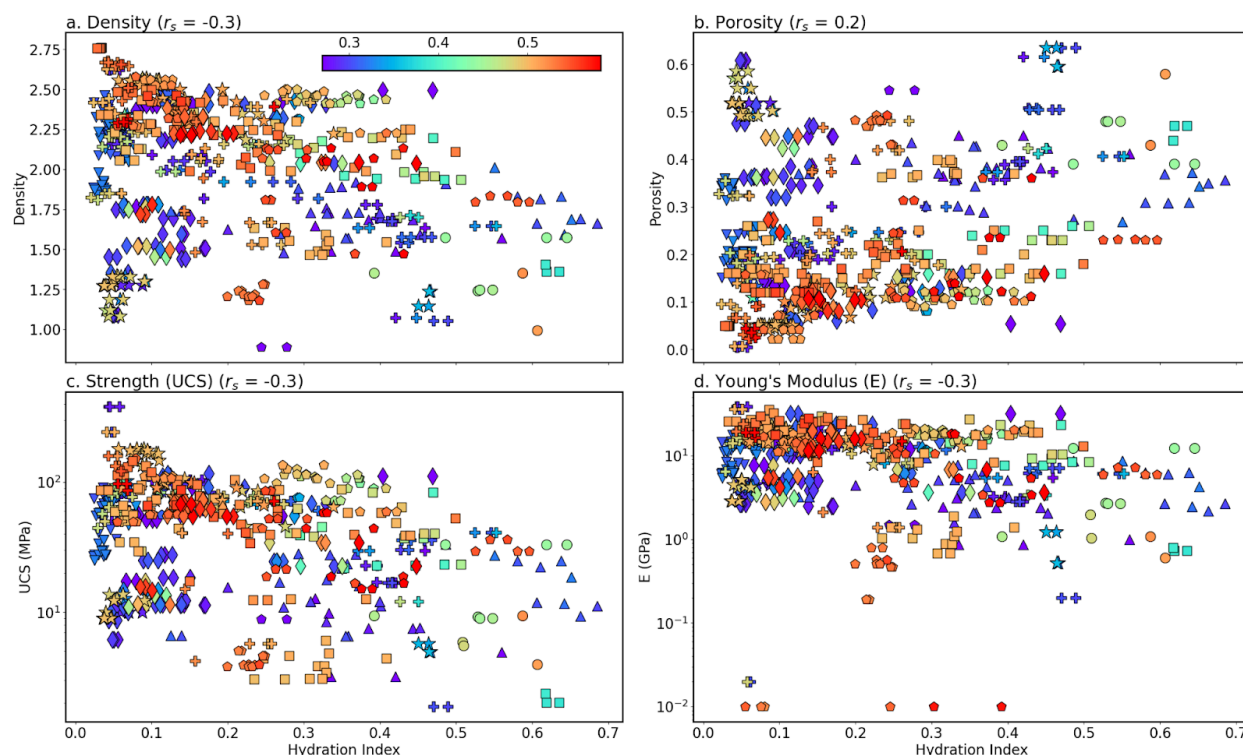

499

500 **Figure 5: Biplots of our hydration index and density (a), porosity (b), uniaxial compressive strength (UCS) (c) and Young's**  
 501 **modulus (E) (d). These indicate that increasing hydration due to hydrothermal alteration and/or weathering tends to decrease**  
 502 **density, UCS and E and slightly increase porosity. These trends are (unsurprisingly) quite weak, with Spearman rank correlation**  
 503 **coefficients of 0.2– 0.3. Colours indicate each sample's MFI, such that basalts are blue and andesites are red. Please refer to the**  
 504 **legend of Fig. 3 for the symbols indicating each volcano.**

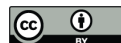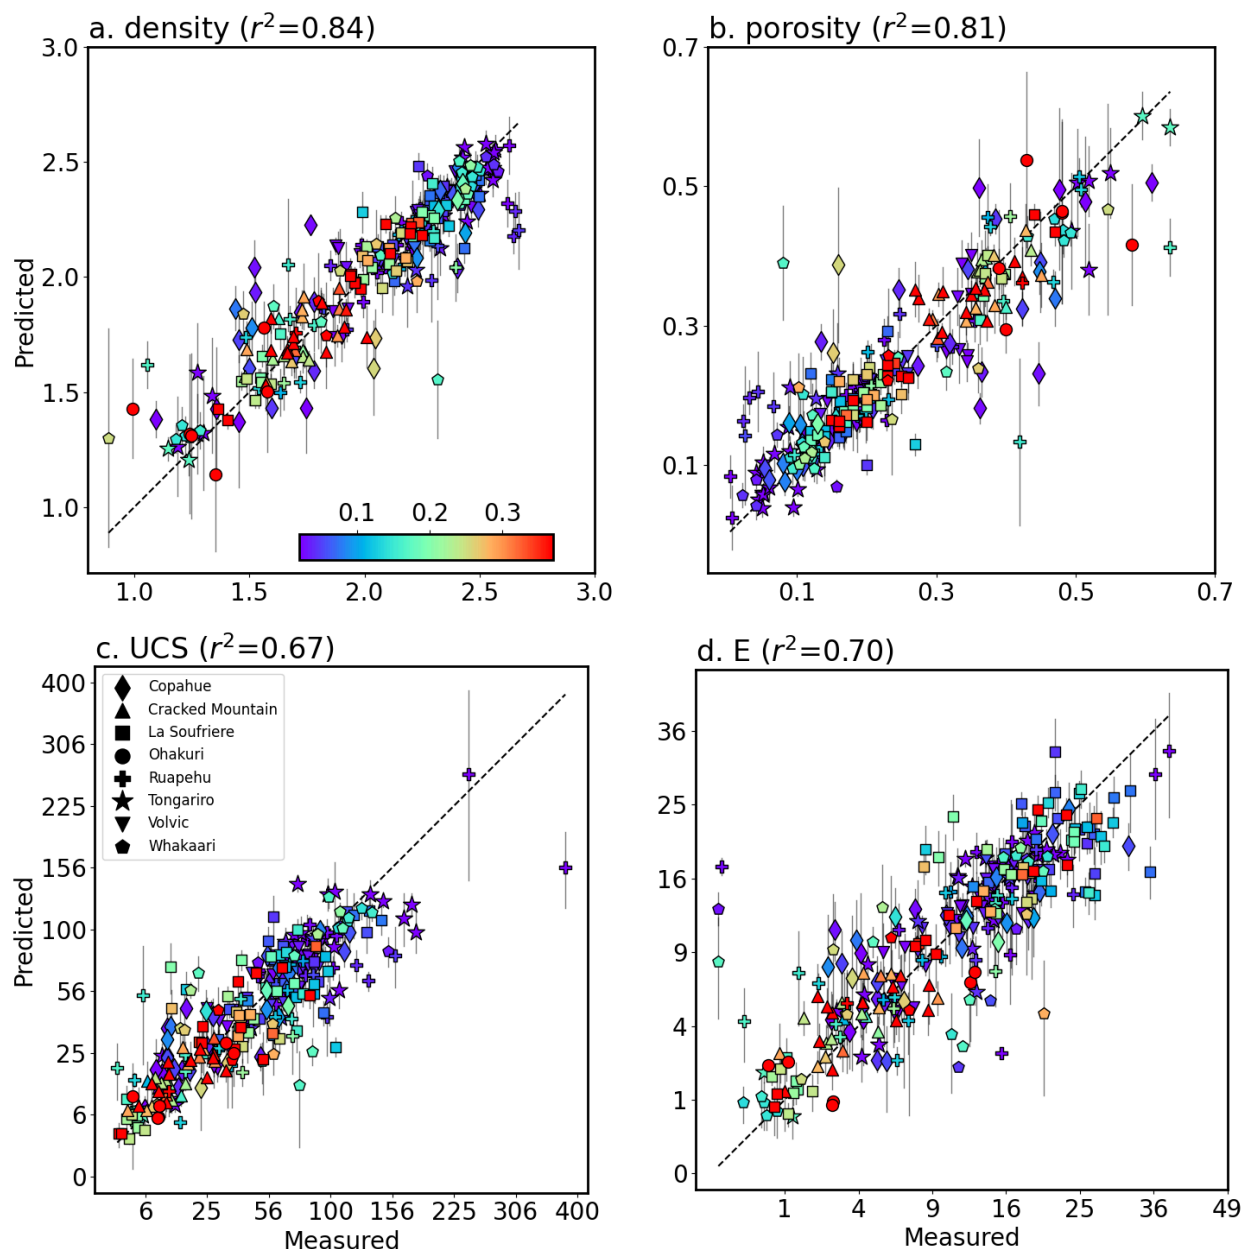

505  
506 **Figure 6: Five-fold cross validation predictions for density (a), porosity (b), uniaxial compressive strength (UCS) (c) and Young's**  
507 **modulus (E) (d) derived using our ensemble of SVM and multilayer perceptron models. The consistency of the ensemble**  
508 **predictions, quantified as the standard deviation of model predictions, are shown as  $2\sigma$  error bars. The majority of the predictions**  
509 **are thus within error of the measured values, although there are also several notable outliers. Symbols denote the different**  
510 **volcanoes included in the dataset, and colours reflect the hydration index (Fig. 3). Note that the x- and y-axes in (c) and (d) use a**  
511 **square-root scale to better visualise data clustered around lower values of UCS and E.**

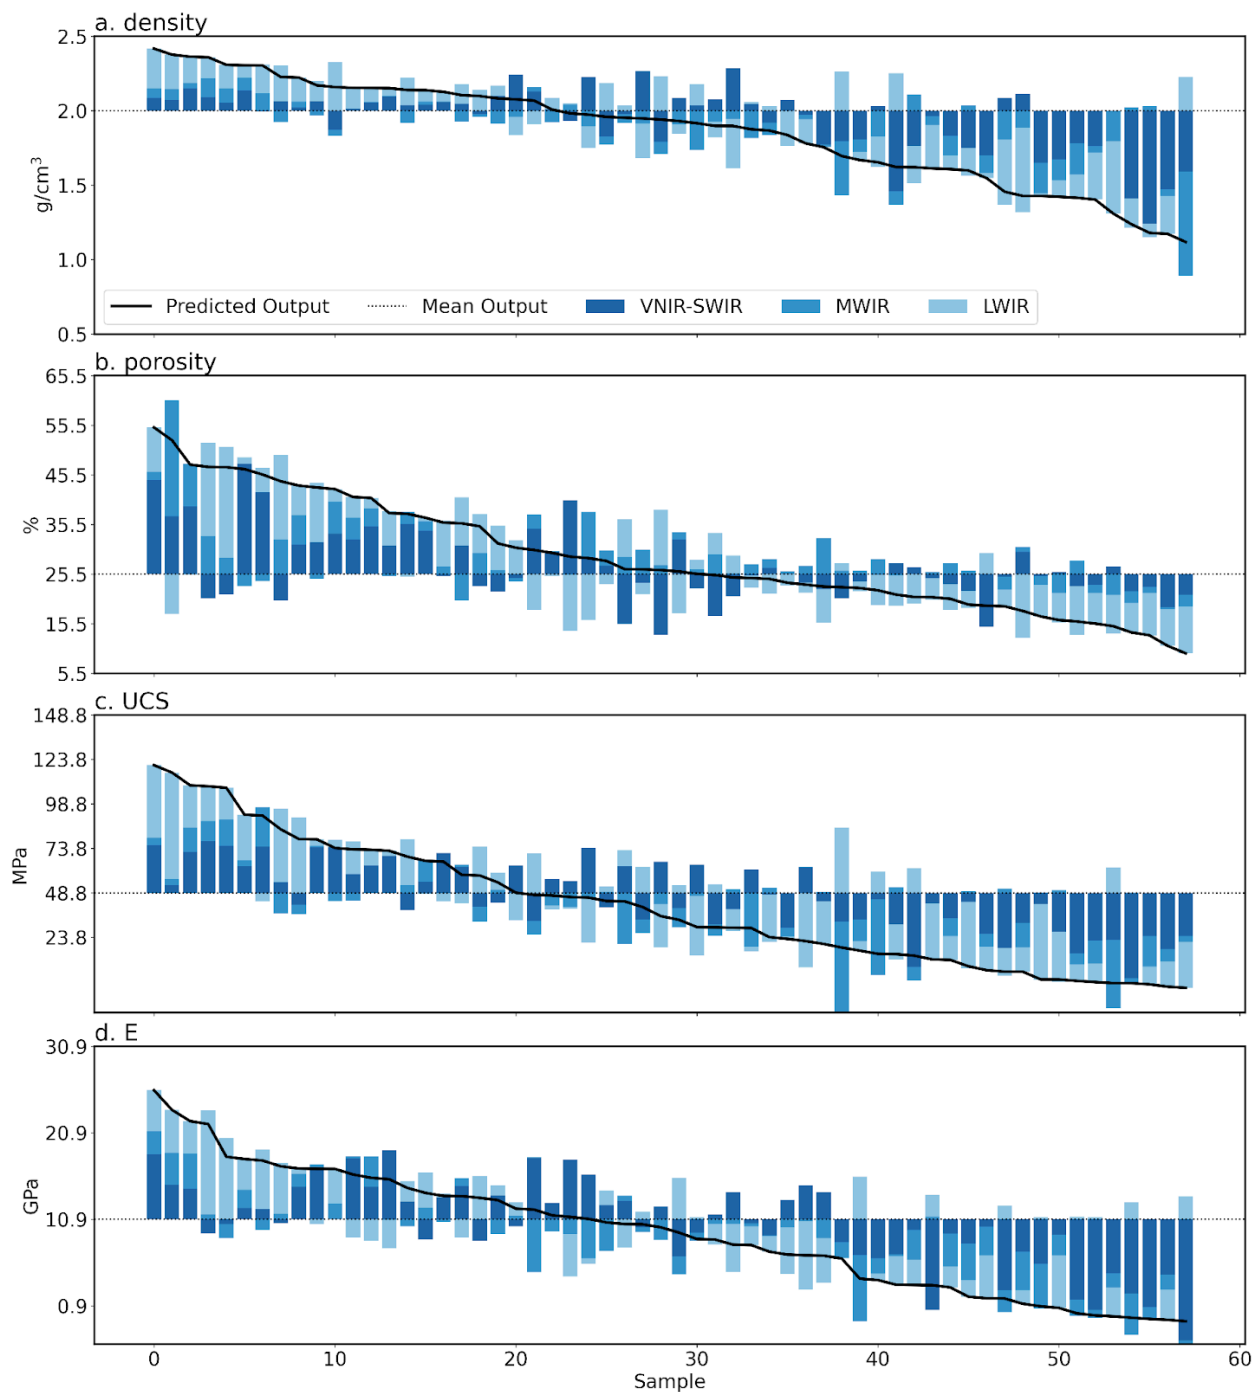

512

513 Figure 7: Shapley values summed for each spectral range (VNIR-SWIR, MWIR, and LWIR) from the joint model (trained on  
514 both basalt and andesite) ensemble, indicating the cumulative contribution of each spectral range to predicted density (a), porosity  
515 (b), uniaxial compressive strength (UCS) (c) and Young's modulus (E) (d). Values for each property are sorted from high to low  
516 predicted value along the x-axis. Higher predictions relative to the mean prediction (dotted line) for density, UCS, and E appear  
517 largely driven by LWIR features, while lower values are associated with strong negative contributions from the VNIR-SWIR



range. These VNIR-SWIR bands push the predicted value down, and likely indicate the influence of SWIR active hydrated alteration minerals.

a. Predictions and Shapley values for the basalt subset

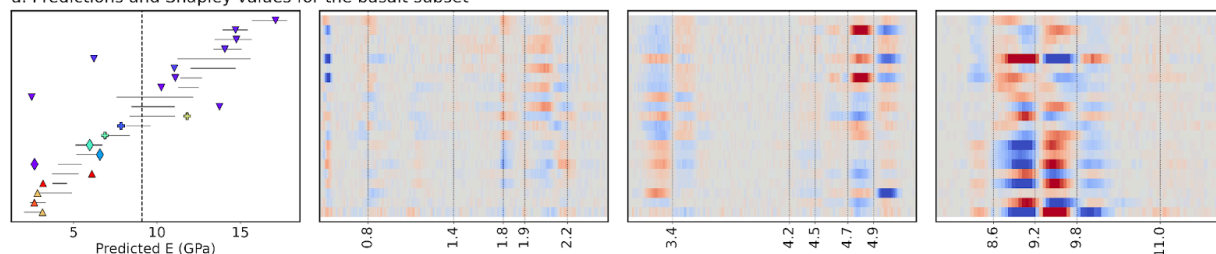

b. Aggregated SHAP values and example spectra (basalt)

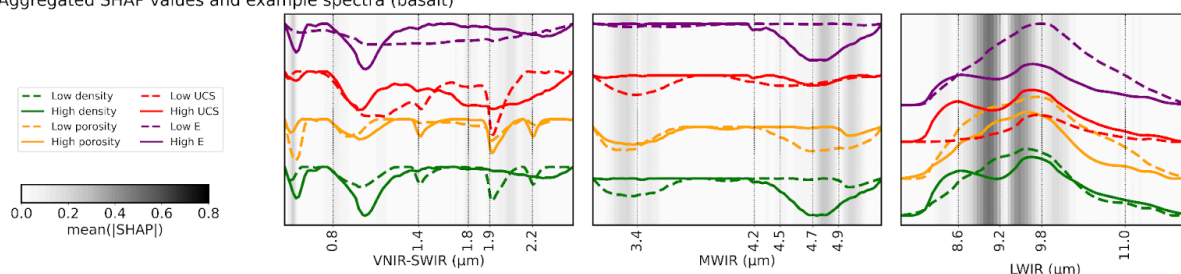

c. Predictions and Shapley values for the andesite subset

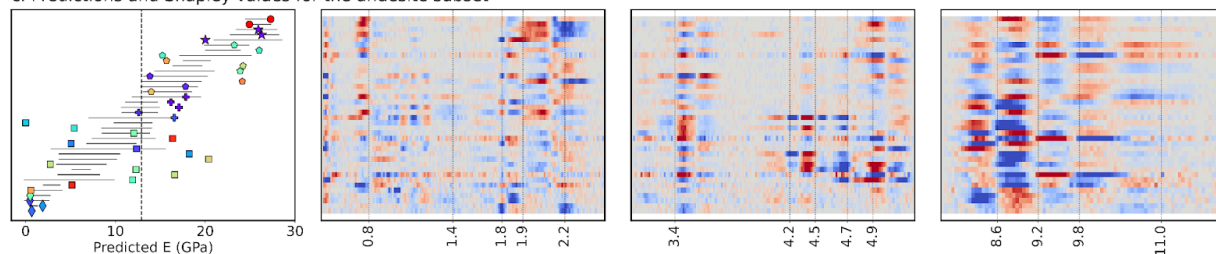

d. Aggregated SHAP values and example spectra (andesite)

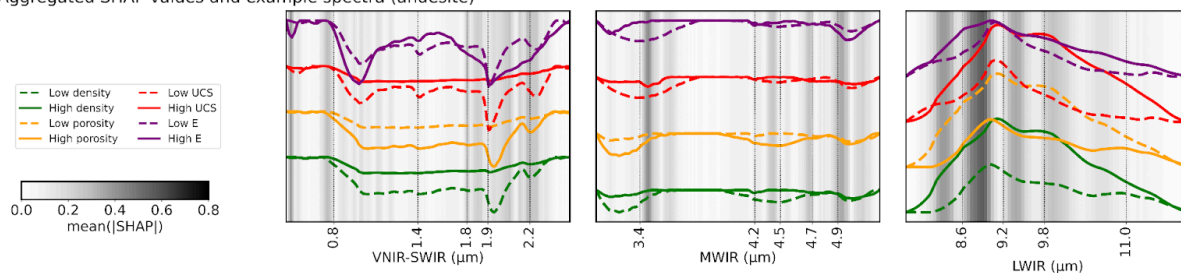

520

Figure 8: Shapley values for our predictions of Young's modulus (E) in the basaltic (a, b) and andesitic (c, d) subsets. These were calculated using the ensemble models trained specifically on each subset (to remove aspects of the joint model focused on lithological distinction). Symbols in the left column indicate the measured property values from each volcano (cf. Fig. 3), while the black solid lines show the (2σ) range of values predicted by the ensemble. Deviations of model predictions from the mean (black dashed line) are the sum of the Shapley values along each row, such that blue values indicate bands that decreased the prediction, while red values indicate bands that increased it. Mean absolute SHAP values (b, d), summarising the sensitivity of the model to specific bands are also shown, with spectra from samples with high (solid) and low (dashed) property values for reference. These Shapley values highlight the correspondence of informative bands and inflection points ("shoulders") in the spectra. Shapley value plots for the other mechanical properties can be found in the supplementary information.



## 530 Acknowledgements

531 ST and AK were supported by funding from the European Union's Horizon Europe research and innovation programme  
532 under grant agreement n° 101058483 and from UK Research and Innovation. GK was supported by the Rutherford  
533 Discovery Fellowship of the Royal Society of New Zealand - Te Aparangi ("Caught in action - volcano surveillance with  
534 hyperspectral remote sensing"; RDF-MAU2003). MH was supported by ANR grant MYGALE ("Modelling the phYsical  
535 and chemical Gradients of hydrothermal ALteration for warning systems of flank collapse at Explosive volcanoes";  
536 ANR-21-CE49-0010) and a European Research Council Synergy Grant (ERC-ROTTnROCK-101118491). MH also  
537 acknowledges support from the Institut Universitaire de France (IUF). MRC and MT were supported by the TelluS Program  
538 of INSU-CNRS ("Edifice structure and rock strength assessment of Copahue volcano (Argentina/Chile): the role of  
539 hyperACidic hydrothermal alteration in VolCano stability (AC/VC)"). The hyperspectral sensors used for this study were  
540 acquired through funding from the Helmholtz Institute Freiberg for Resource Technology, European Regional Development  
541 Fund and the Land of Saxony.

## 542 References

- 543 Arens, F., Coco, A., Gottsmann, J., Hickey, J., Kilgour, G., 2022. Multiphysics Modeling of Volcanic Unrest at Mt. Ruapehu  
544 (New Zealand). *Geochem. Geophys. Geosystems* 23, e2022GC010572. <https://doi.org/10.1029/2022GC010572>
- 545 Aubry, T.J., Farquharson, J.I., Rowell, C.R., Watt, S.F.L., Pinel, V., Beckett, F., Fasullo, J., Hopcroft, P.O., Pyle, D.M.,  
546 Schmidt, A., Sykes, J.S., 2022. Impact of climate change on volcanic processes: current understanding and future  
547 challenges. *Bull. Volcanol.* 84, 58. <https://doi.org/10.1007/s00445-022-01562-8>
- 548 Bakun-Mazor, D., Ben-Ari, Y., Marco, S., Ben-Dor, E., 2024. Predicting Mechanical Properties of Carbonate Rocks Using  
549 Spectroscopy Across 0.4–12  $\mu\text{m}$ . *Rock Mech. Rock Eng.* 57, 8951–8968. <https://doi.org/10.1007/s00603-024-04035-w>
- 550 Chandrasekhar, S. (Subrahmanyam), 1960. Radiative transfer. New York : Dover Publications.
- 551 Cudahy, T., Jones, M., Thomas, M., Laukamp, C., Caccetta, M., Hewson, R., Rodger, A., Verrall, M., 2008. Next generation  
552 mineral mapping: Queensland airborne HyMap and satellite ASTER surveys 2006–2008. Perth Publicly Available Rep.  
553 P2007364 152.
- 554 Cundall, P.A., Pierce, M.E., Mas Ivars, D., 2008. Quantifying the size effect of rock mass strength, in: SHIRMS 2008:  
555 Proceedings of the First Southern Hemisphere International Rock Mechanics Symposium. Australian Centre for  
556 Geomechanics, pp. 3–15.
- 557 del Potro, R., Hürlimann, M., 2009. A Comparison of Different Indirect Techniques to Evaluate Volcanic Intact Rock  
558 Strength. *Rock Mech. Rock Eng.* 42, 931–938. <https://doi.org/10.1007/s00603-008-0001-5>
- 559 Dewez, T.J.B., Girardeau-Montaut, D., Allanic, C., Rohmer, J., 2016. Facets : a cloudcompare plugin to extract geological  
560 planes from unstructured 3D point clouds. *ISPRS Int. Arch. Photogramm. Remote Sens. Spat. Inf. Sci.* XLI-B5, 799.  
561 <https://doi.org/10.5194/isprsarchives-xli-b5-799-2016>



- 562 Dinçer, I., Acar, A., Çobanoğlu, I., Uras, Y., 2004. Correlation between Schmidt hardness, uniaxial compressive strength and  
563 Young's modulus for andesites, basalts and tuffs. *Bull. Eng. Geol. Environ.* 63, 141–148.  
564 <https://doi.org/10.1007/s10064-004-0230-0>
- 565 Farquharson, J., Heap, M.J., Varley, N.R., Baud, P., Reuschlé, T., 2015. Permeability and porosity relationships of  
566 edifice-forming andesites: A combined field and laboratory study. *J. Volcanol. Geotherm. Res.* 297, 52–68.  
567 <https://doi.org/10.1016/j.jvolgeores.2015.03.016>
- 568 Foster, S., Chilton, J., Nijsten, G.-J., Richts, A., 2013. Groundwater—a global focus on the ‘local resource.’ *Curr. Opin.*  
569 *Environ. Sustain., Aquatic and marine systems* 5, 685–695. <https://doi.org/10.1016/j.cosust.2013.10.010>
- 570 Franzosi, F., Crippa, C., Derron, M.-H., Jaboyedoff, M., Agliardi, F., 2023. Slope-Scale Remote Mapping of Rock Mass  
571 Fracturing by Modeling Cooling Trends Derived from Infrared Thermography. *Remote Sens.* 15, 4525.  
572 <https://doi.org/10.3390/rs15184525>
- 573 Griffiths, L., Heap, M.J., Baud, P., Schmittbuhl, J., 2017. Quantification of microcrack characteristics and implications for  
574 stiffness and strength of granite. *Int. J. Rock Mech. Min. Sci.* 100, 138–150. <https://doi.org/10.1016/j.ijrmms.2017.10.013>
- 575 Hapke, B., 2012. *Theory of Reflectance and Emittance Spectroscopy*. Cambridge University Press.
- 576 Hapke, B., 2008. Bidirectional reflectance spectroscopy: 6. Effects of porosity. *Icarus* 195, 918–926.  
577 <https://doi.org/10.1016/j.icarus.2008.01.003>
- 578 Hapke, B., 2002. Bidirectional Reflectance Spectroscopy: 5. The Coherent Backscatter Opposition Effect and Anisotropic  
579 Scattering. *Icarus* 157, 523–534. <https://doi.org/10.1006/icar.2002.6853>
- 580 Hapke, B., 1993. *Theory of Reflectance and Emittance Spectroscopy, Topics in Remote Sensing*. Cambridge University  
581 Press, Cambridge. <https://doi.org/10.1017/CBO9780511524998>
- 582 Hapke, B., 1986. Bidirectional reflectance spectroscopy: 4. The extinction coefficient and the opposition effect. *Icarus* 67,  
583 264–280. [https://doi.org/10.1016/0019-1035\(86\)90108-9](https://doi.org/10.1016/0019-1035(86)90108-9)
- 584 Hapke, B., 1984. Bidirectional reflectance spectroscopy: 3. Correction for macroscopic roughness. *Icarus* 59, 41–59.  
585 [https://doi.org/10.1016/0019-1035\(84\)90054-X](https://doi.org/10.1016/0019-1035(84)90054-X)
- 586 Hapke, B., 1981. Bidirectional reflectance spectroscopy: 1. Theory. *J. Geophys. Res. Solid Earth* 86, 3039–3054.  
587 <https://doi.org/10.1029/JB086iB04p03039>
- 588 Hardgrove, C.J., Rogers, A.D., Glotch, T.D., Arnold, J.A., 2016. Thermal emission spectroscopy of microcrystalline  
589 sedimentary phases: Effects of natural surface roughness on spectral feature shape. *J. Geophys. Res. Planets* 121,  
590 542–555. <https://doi.org/10.1002/2015JE004919>
- 591 Harnett, C.E., Heap, M.J., 2021. Mechanical and topographic factors influencing lava dome growth and collapse. *J.*  
592 *Volcanol. Geotherm. Res.* 420, 107398. <https://doi.org/10.1016/j.jvolgeores.2021.107398>
- 593 Harnett, C.E., Kendrick, J.E., Lamur, A., Thomas, M.E., Stinton, A., Wallace, P.A., Utley, J.E.P., Murphy, W., Neuberg, J.,  
594 Lavallée, Y., 2019. Evolution of Mechanical Properties of Lava Dome Rocks Across the 1995–2010 Eruption of  
595 Soufrière Hills Volcano, Montserrat. *Front. Earth Sci.* 7. <https://doi.org/10.3389/feart.2019.00007>





- 596 Heap, M.J., Baumann, T., Gilg, H.A., Kolzenburg, S., Ryan, A.G., Villeneuve, M., Russell, J.K., Kennedy, L.A.,  
597 Rosas-Carbajal, M., Clynne, M.A., 2021a. Hydrothermal alteration can result in pore pressurization and volcano  
598 instability. *Geology* 49, 1348–1352. <https://doi.org/10.1130/G49063.1>
- 599 Heap, M.J., Baumann, T.S., Rosas-Carbajal, M., Komorowski, J.-C., Gilg, H.A., Villeneuve, M., Moretti, R., Baud, P.,  
600 Carbillet, L., Harnett, C., Reuschlé, T., 2021b. Alteration-Induced Volcano Instability at La Soufrière de Guadeloupe  
601 (Eastern Caribbean). *J. Geophys. Res. Solid Earth* 126, e2021JB022514. <https://doi.org/10.1029/2021JB022514>
- 602 Heap, M.J., Gravley, D.M., Kennedy, B.M., Gilg, H.A., Bertolett, E., Barker, S.L.L., 2020a. Quantifying the role of  
603 hydrothermal alteration in creating geothermal and epithermal mineral resources: The Ohakuri ignimbrite (Taupō  
604 Volcanic Zone, New Zealand). *J. Volcanol. Geotherm. Res.* 390, 106703.  
605 <https://doi.org/10.1016/j.jvolgeores.2019.106703>
- 606 Heap, M.J., Troll, V.R., Harris, C., Gilg, H.A., Moretti, R., Rosas-Carbajal, M., Komorowski, J.-C., Baud, P., 2022.  
607 Whole-rock oxygen isotope ratios as a proxy for the strength and stiffness of hydrothermally altered volcanic rocks. *Bull.*  
608 *Volcanol.* 84, 74. <https://doi.org/10.1007/s00445-022-01588-y>
- 609 Heap, M.J., Villeneuve, M., Albino, F., Farquharson, J.I., Brothelande, E., Amelung, F., Got, J.-L., Baud, P., 2020b. Towards  
610 more realistic values of elastic moduli for volcano modelling. *J. Volcanol. Geotherm. Res.* 390, 106684.  
611 <https://doi.org/10.1016/j.jvolgeores.2019.106684>
- 612 Heap, M.J., Violay, M.E.S., 2021. The mechanical behaviour and failure modes of volcanic rocks: a review. *Bull. Volcanol.*  
613 83, 33. <https://doi.org/10.1007/s00445-021-01447-2>
- 614 Hickey, J., Pascal, K., Head, M., Gottsmann, J., Fournier, N., Hreinsdottir, S., Syers, R., 2022. Magma pressurization  
615 sustains ongoing eruptive episode at dome-building Soufrière Hills volcano, Montserrat. *Geology* 50, 1261–1265.  
616 <https://doi.org/10.1130/G50239.1>
- 617 Hoek, E., Diederichs, M.S., 2006. Empirical estimation of rock mass modulus. *Int. J. Rock Mech. Min. Sci.* 43, 203–215.
- 618 Huang, J., Liu, S., Liu, W., Zhang, C., Li, S., Yu, M., Wu, L., 2021. Experimental Study on the Thermal Infrared Spectral  
619 Variation of Fractured Rock. *Remote Sens.* 13, 1191. <https://doi.org/10.3390/rs13061191>
- 620 Hunt, G.R., Vincent, R.K., 1968. The behavior of spectral features in the infrared emission from particulate surfaces of  
621 various grain sizes. *J. Geophys. Res.* 1896-1977 73, 6039–6046. <https://doi.org/10.1029/JB073i018p06039>
- 622 Ivars, D.M., Deisman, N., Pierce, M., Fairhurst, C., 2007. The synthetic rock mass approach-a step forward in the  
623 characterization of jointed rock masses, in: 11th ISRM Congress. OnePetro.
- 624 Kereszturi, G., Heap, M., Schaefer, L.N., Darmawan, H., Deegan, F.M., Kennedy, B., Komorowski, J.-C., Mead, S.,  
625 Rosas-Carbajal, M., Ryan, A., Troll, V.R., Villeneuve, M., Walter, T.R., 2023. Porosity, strength, and alteration – Towards  
626 a new volcano stability assessment tool using VNIR-SWIR reflectance spectroscopy. *Earth Planet. Sci. Lett.* 602, 117929.  
627 <https://doi.org/10.1016/j.epsl.2022.117929>



- 628 Kereszturi, G., Schaefer, L.N., Miller, C., Mead, S., 2020. Hydrothermal Alteration on Composite Volcanoes: Mineralogy,  
629 Hyperspectral Imaging, and Aeromagnetic Study of Mt Ruapehu, New Zealand. *Geochem. Geophys. Geosystems* 21,  
630 e2020GC009270. <https://doi.org/10.1029/2020GC009270>
- 631 Kidd, M., Kereszturi, G., Kennedy, B., Heap, M., Procter, J., 2025. Linking hydrothermal alteration to rock mechanics:  
632 comparative analysis of andesitic volcanoes in Aotearoa - New Zealand.
- 633 Kirkland, L.E., Herr, K.C., Adams, P.M., 2003. Infrared stealthy surfaces: Why TES and THEMIS may miss some  
634 substantial mineral deposits on Mars and implications for remote sensing of planetary surfaces. *J. Geophys. Res. Planets*  
635 108. <https://doi.org/10.1029/2003JE002105>
- 636 Kirkland, L.E., Herr, K.C., Salisbury, J.W., 2001. Thermal infrared spectral band detection limits for unidentified surface  
637 materials. *Appl. Opt.* 40, 4852–4862. <https://doi.org/10.1364/AO.40.004852>
- 638 Laukamp, C., Cudahy, T., Cleverley, J.S., Oliver, N.H.S., Hewson, R., 2011. Airborne hyperspectral imaging of  
639 hydrothermal alteration zones in granitoids of the Eastern Fold Belt, Mount Isa Inlier, Australia. *Geochem. Explor.*  
640 *Environ. Anal.* 11, 3–24. <https://doi.org/10.1144/1467-7873/09-231>
- 641 Laukamp, C., Rodger, A., LeGras, M., Lampinen, H., Lau, I.C., Pejčic, B., Stromberg, J., Francis, N., Ramanaidou, E., 2021.  
642 Mineral Physicochemistry Underlying Feature-Based Extraction of Mineral Abundance and Composition from  
643 Shortwave, Mid and Thermal Infrared Reflectance Spectra. *Minerals* 11, 347. <https://doi.org/10.3390/min11040347>
- 644 Lee, J., Cook, O.J., Argüelles, A.P., Mehmani, Y., 2023. Imaging geomechanical properties of shales with infrared light. *Fuel*  
645 334, 126467. <https://doi.org/10.1016/j.fuel.2022.126467>
- 646 Leight, C.J., Ytsma, C., McCanta, M.C., Dyar, M.D., Glotch, T.D., 2024. Compositional Characterization of Glassy Volcanic  
647 Material From VSWIR and MIR Spectra Using Partial Least Squares Regression Models. *Earth Space Sci.* 11,  
648 e2023EA003439. <https://doi.org/10.1029/2023EA003439>
- 649 Leiter, S., Russell, J.K., Heap, M.J., Barendregt, R.W., Wilson, S., Edwards, B., 2024. Distribution, intensity, and timing of  
650 palagonitization in glaciovolcanic deposits, Cracked Mountain volcano, Canada. *Bull. Volcanol.* 86, 32.  
651 <https://doi.org/10.1007/s00445-024-01724-w>
- 652 Lewicka, E., Guzik, K., Galos, K., 2021. On the Possibilities of Critical Raw Materials Production from the EU's Primary  
653 Sources. *Resources* 10, 50. <https://doi.org/10.3390/resources10050050>
- 654 Loche, M., Scaringi, G., Blahůt, J., Melis, M.T., Funedda, A., Da Pelo, S., Erbi, I., Deiana, G., Meloni, M.A., Cocco, F.,  
655 2021. An Infrared Thermography Approach to Evaluate the Strength of a Rock Cliff. *Remote Sens.* 13, 1265.  
656 <https://doi.org/10.3390/rs13071265>
- 657 Lund, J.W., Toth, A.N., 2021. Direct utilization of geothermal energy 2020 worldwide review. *Geothermics* 90, 101915.  
658 <https://doi.org/10.1016/j.geothermics.2020.101915>
- 659 Lundberg, S., Lee, S.-I., 2017. A Unified Approach to Interpreting Model Predictions.  
660 <https://doi.org/10.48550/arXiv.1705.07874>



- 661 Lyon, R.J.P., 1965. Analysis of rocks by spectral infrared emission (8 to 25 microns). *Econ. Geol.* 60, 715–736.  
662 <https://doi.org/10.2113/gsecongeo.60.4.715>
- 663 Mineo, S., Pappalardo, G., 2016. The Use of Infrared Thermography for Porosity Assessment of Intact Rock. *Rock Mech.*  
664 *Rock Eng.* 49, 3027–3039. <https://doi.org/10.1007/s00603-016-0992-2>
- 665 Mordensky, S.P., Villeneuve, M.C., Farquharson, J.I., Kennedy, B.M., Heap, M.J., Gravley, D.M., 2018. Rock mass  
666 properties and edifice strength data from Pinnacle Ridge, Mt. Ruapehu, New Zealand. *J. Volcanol. Geotherm. Res.* 367,  
667 46–62. <https://doi.org/10.1016/j.jvolgeores.2018.09.012>
- 668 Mustard, J.F., Hays, J.E., 1997. Effects of Hyperfine Particles on Reflectance Spectra from 0.3 to 25  $\mu\text{m}$ . *Icarus* 125,  
669 145–163. <https://doi.org/10.1006/icar.1996.5583>
- 670 Osterloo, M.M., Hamilton, V.E., Anderson, F.S., 2012. A laboratory study of the effects of roughness on the thermal infrared  
671 spectra of rock surfaces. *Icarus* 220, 404–426. <https://doi.org/10.1016/j.icarus.2012.04.020>
- 672 Poganj, A., Heap, M.J., Baud, P., 2025. Spatial distribution of alteration and strength in a lava dome: Implications for  
673 large-scale volcano stability modelling. *J. Volcanol. Geotherm. Res.*
- 674 Pola, A., Crosta, G., Fusi, N., Barberini, V., Norini, G., 2012. Influence of alteration on physical properties of volcanic rocks.  
675 *Tectonophysics* 566–567, 67–86. <https://doi.org/10.1016/j.tecto.2012.07.017>
- 676 Portela, B., Sepp, M.D., van Ruitenbeek, F.J.A., Hecker, C., Dilles, J.H., 2021. Using hyperspectral imagery for  
677 identification of pyrophyllite-muscovite intergrowths and alunite in the shallow epithermal environment of the Yerington  
678 porphyry copper district. *Ore Geol. Rev.* 131, 104012. <https://doi.org/10.1016/j.oregeorev.2021.104012>
- 679 Rost, E., Hecker, C., Schodlok, M.C., Van der Meer, F.D., 2018. Rock Sample Surface Preparation Influences Thermal  
680 Infrared Spectra. *Minerals* 8, 475. <https://doi.org/10.3390/min8110475>
- 681 Salisbury, J.W., Eastes, J.W., 1985. The effect of particle size and porosity on spectral contrast in the mid-infrared. *Icarus* 64,  
682 586–588. [https://doi.org/10.1016/0019-1035\(85\)90078-8](https://doi.org/10.1016/0019-1035(85)90078-8)
- 683 Salisbury, J.W., Wald, A., 1992. The role of volume scattering in reducing spectral contrast of reststrahlen bands in spectra of  
684 powdered minerals. *Icarus* 96, 121–128. [https://doi.org/10.1016/0019-1035\(92\)90009-V](https://doi.org/10.1016/0019-1035(92)90009-V)
- 685 Schaefer, L.N., Kereszturi, G., Kennedy, B.M., Villeneuve, M., 2023. Characterizing lithological, weathering, and  
686 hydrothermal alteration influences on volcanic rock properties via spectroscopy and laboratory testing: a case study of  
687 Mount Ruapehu volcano, New Zealand. *Bull. Volcanol.* 85, 43. <https://doi.org/10.1007/s00445-023-01657-w>
- 688 Schaefer, L.N., Kereszturi, G., Villeneuve, M., Kennedy, B., 2021. Determining physical and mechanical volcanic rock  
689 properties via reflectance spectroscopy. *J. Volcanol. Geotherm. Res.* 420, 107393.  
690 <https://doi.org/10.1016/j.jvolgeores.2021.107393>
- 691 Schodlok, M.C., Whitbourn, L., Huntington, J., Mason, P., Green, A., Berman, M., Coward, D., Connor, P., Wright, W.,  
692 Jolivet, M., Martinez, R., 2016. HyLogger-3, a visible to shortwave and thermal infrared reflectance spectrometer system  
693 for drill core logging: functional description. *Aust. J. Earth Sci.*



- 694 Shapley, L.S., 1973. On Balanced Games without Side Payments, in: Hu, T.C., Robinson, S.M. (Eds.), Mathematical  
695 Programming. Academic Press, pp. 261–290. <https://doi.org/10.1016/B978-0-12-358350-5.50012-9>
- 696 Simpson, M.P., Rae, A.J., 2018. Short-wave infrared (SWIR) reflectance spectrometric characterisation of clays from  
697 geothermal systems of the Taupō Volcanic Zone, New Zealand. *Geothermics* 73, 74–90.  
698 <https://doi.org/10.1016/j.geothermics.2018.01.006>
- 699 Soltani, M., Moradi Kashkooli, F., Dehghani-Sanij, A.R., Nokhosteen, A., Ahmadi-Joughi, A., Gharali, K., Mahbaz, S.B.,  
700 Dusseault, M.B., 2019. A comprehensive review of geothermal energy evolution and development. *Int. J. Green Energy*  
701 16, 971–1009. <https://doi.org/10.1080/15435075.2019.1650047>
- 702 Strehlow, K., Gottsmann, J.H., Rust, A.C., 2015. Poroelastic responses of confined aquifers to subsurface strain and their use  
703 for volcano monitoring. *Solid Earth* 6, 1207–1229. <https://doi.org/10.5194/se-6-1207-2015>
- 704 Swanson, E., Wilson, J., Broome, S., Sussman, A., 2020. The Complicated Link Between Material Properties and  
705 Microfracture Density for an Underground Explosion in Granite. *J. Geophys. Res. Solid Earth* 125, e2020JB019894.  
706 <https://doi.org/10.1029/2020JB019894>
- 707 Takemura, T., Golshani, A., Oda, M., Suzuki, K., 2003. Preferred orientations of open microcracks in granite and their  
708 relation with anisotropic elasticity. *Int. J. Rock Mech. Min. Sci.* 40, 443–454.  
709 [https://doi.org/10.1016/S1365-1609\(03\)00014-5](https://doi.org/10.1016/S1365-1609(03)00014-5)
- 710 Thiele, S.T., Bnoukacem, Z., Lorenz, S., Bordenave, A., Menegoni, N., Madriz, Y., Dujoncuoy, E., Gloaguen, R., Kenter,  
711 J., 2022. Mineralogical Mapping with Accurately Corrected Shortwave Infrared Hyperspectral Data Acquired Obliquely  
712 from UAVs. *Remote Sens.* 14, 5. <https://doi.org/10.3390/rs14010005>
- 713 Thiele, S.T., Grose, L., Samsu, A., Mickelthwaite, S., Vollgger, S.A., Cruden, A.R., 2017. Rapid, semi-automatic fracture  
714 and contact mapping for point clouds, images and geophysical data. *Solid Earth* 8, 1241.
- 715 Thiele, S.T., Kirsch, M., Lorenz, S., Saffi, H., El Alami, S., Contreras Acosta, I.C., Madriz, Y., Gloaguen, R., 2024.  
716 Maximising the value of hyperspectral drill core scanning through real-time processing and analysis. *Front. Earth Sci.* 12.  
717 <https://doi.org/10.3389/feart.2024.1433662>
- 718 Thiele, S.T., Lorenz, S., Kirsch, M., Acosta, I.C.C., Tusa, L., Hermann, E., Möckel, R., Gloaguen, R., 2021. Multi-scale,  
719 multi-sensor data integration for automated 3-D geological mapping using hylite. *Ore Geol. Rev.* 136.  
720 <https://doi.org/10.1016/j.oregeorev.2021.104252>
- 721 Tramontini, M., Rosas-Carbajal, M., Heap, M.J., Besson, P., Marteau, J., García, S., Zyserman, F.I., 2025. The effects of  
722 hydrothermal alteration in the upper edifice of Copahue volcano (Argentina-Chile). Presented at the IAVCEI Conference,  
723 Geneva.
- 724 Vairé, E., Heap, M.J., Baud, P., van Wyk de Vries, B., 2024. Quantifying the physical and mechanical heterogeneity of  
725 porous volcanic rocks from the Chaîne des Puys (Massif Central, France). *Bull. Volcanol.* 86, 49.  
726 <https://doi.org/10.1007/s00445-024-01742-8>

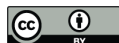

- 727 van der Meer, F., Kopačková, V., Koucká, L., van der Werff, H.M.A., van Ruitenbeek, F.J.A., Bakker, W.H., 2018.  
728 Wavelength feature mapping as a proxy to mineral chemistry for investigating geologic systems: An example from the  
729 Rodalquilar epithermal system. *Int. J. Appl. Earth Obs. Geoinformation* 64, 237–248.  
730 <https://doi.org/10.1016/j.jag.2017.09.008>
- 731 Vincent, R.K., Hunt, G.R., 1968. Infrared Reflectance from Mat Surfaces. *Appl. Opt.* 7, 53–59.  
732 <https://doi.org/10.1364/AO.7.000053>
- 733 Vrakas, A., Dong, W., Anagnostou, G., 2018. Elastic deformation modulus for estimating convergence when tunnelling  
734 through squeezing ground. *Géotechnique* 68, 713–728. <https://doi.org/10.1680/jgeot.17.P.008>
- 735 Williams, D.B., Ramsey, M.S., 2024. Infrared spectroscopy of volcanoes: from laboratory to orbital scale. *Front. Earth Sci.*  
736 12. <https://doi.org/10.3389/feart.2024.1308103>
- 737
